# Supplementary material
Source: publisher figshare collection journal article supplement (https://acs.figshare.com/ndownloader/files/4693828)

## A Concise Asymmetric Synthesis of Torcetrapib

Meritxell Guino,<sup>a</sup> Pim Huat Phua,<sup>a</sup> Jean-Claude Caille<sup>b</sup> and King Kuok (Mimi) Hii<sup>a,\*</sup>

<sup>a</sup> *Department of Chemistry, Imperial College London, Exhibition Road, South Kensington, London SW7 2AZ, United Kingdom.*

<sup>b</sup> *PPG Fine Chemicals, Z. I. la Croix Cadeau, B. P. 79, 49242 Avrillé Cedex, France.*

|                                                                                                                                                                                                                                  |         |
|----------------------------------------------------------------------------------------------------------------------------------------------------------------------------------------------------------------------------------|---------|
| <b>General Experimental</b> .....                                                                                                                                                                                                | S2      |
| <b>Experimental</b> .....                                                                                                                                                                                                        | S2-S8   |
| <b>Table S1.</b> Reaction optimisation 1: Dilution, reaction temperature and catalyst loading.....                                                                                                                               | S4      |
| <b>Table S2.</b> Reaction optimisation 2: Solvent and substrate ratio.....                                                                                                                                                       | S4      |
| <b>Fig. S1/2.</b> <sup>1</sup> H and <sup>13</sup> C NMR spectra of methyl carbamate phosphonate ester, <b>3a</b> .....                                                                                                          | S9-S10  |
| <b>Fig. S3/4.</b> <sup>1</sup> H and <sup>13</sup> C NMR spectra of benzyl carbamate phosphonate ester, <b>3b</b> .....                                                                                                          | S11-S12 |
| <b>Fig. S5/6.</b> <sup>1</sup> H and <sup>13</sup> C NMR spectra of <i>N</i> -(pent-2-enoyl)methyl carbamate, <b>4a</b> .....                                                                                                    | S13-S14 |
| <b>Fig. S7/8.</b> <sup>1</sup> H and <sup>13</sup> C NMR spectra of <i>N</i> -(pent-2-enoyl)benzyl carbamate, <b>4b</b> .....                                                                                                    | S15-S16 |
| <b>Fig. S9/10.</b> <sup>1</sup> H and <sup>13</sup> C NMR spectra of <i>N</i> -[3-(4-trifluoromethyl-phenylamino)-pentanoyl]methyl carbamate, <b>2a</b> .....                                                                    | S17-S18 |
| <b>Figure S11/12.</b> <sup>1</sup> H and <sup>13</sup> C NMR spectra of <i>N</i> -[3-(4-trifluoromethyl-phenylamino)-pentanoyl]benzyl carbamate, <b>2b</b> .....                                                                 | S19-S20 |
| <b>Figure S13/14.</b> HPLC chromatographs of ( <i>rac</i> )- and ( <i>S</i> )- <b>2b</b> (89% ee).....                                                                                                                           | S21     |
| <b>Figure S15/16.</b> <sup>1</sup> H and <sup>13</sup> C NMR spectra of (2 <i>R</i> ,4 <i>S</i> )-(2-ethyl-6-trifluoromethyl-1,2,3,4-tetrahydroquinolin-4-yl)carbamic acid methyl ester, <b>5</b> .....                          | S22-S23 |
| <b>Fig. S17/18.</b> <sup>1</sup> H and <sup>13</sup> C NMR spectra of (2 <i>R</i> ,4 <i>S</i> )-2-ethyl-4-methoxycarbonylamino-6-trifluoromethyl-3,4-dihydro-2 <i>H</i> -quinoline-1-carboxylic acid ethyl ester, <b>6</b> ..... | S24-S25 |
| <b>Fig. S19/20.</b> <sup>1</sup> H and <sup>13</sup> C NMR spectra of Torcetrapib, <b>1</b> (at 55 °C).....                                                                                                                      | S26-S27 |

## General experimental

All reactions involving air and/or moisture sensitive compounds were conducted under an atmosphere of dry nitrogen, using oven-dried glassware and dry solvents. Nuclear magnetic resonance (NMR) spectra were recorded as solutions in CDCl<sub>3</sub>. The peak positions are reported with shifts ( $\delta$ ) in ppm referenced to the residual undeuterated chloroform solvent peak ( $\delta_{\text{H}}$  7.26,  $\delta_{\text{C}}$  77.00). The coupling constants ( $J$ ) are reported in Hertz (Hz). The following abbreviations are used: s (singlet), d (doublet), t (triplet), q (quartet), m (multiplet), and br (broad). Assignment of resonance signals (where given) was confirmed by relevant correlation experiments. Melting points were uncorrected.

## Experimental

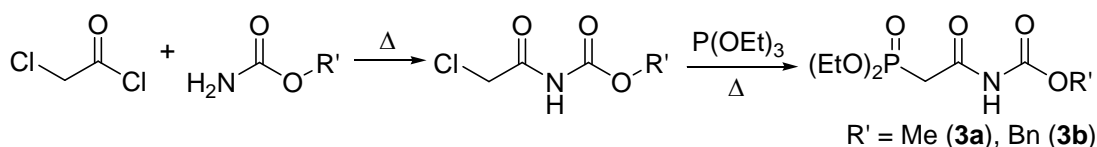

**Preparation of the phosphonate esters 3a and 3b:** Under a N<sub>2</sub> atmosphere, a mixture of alkyl carbamate (0.132 mol) and chloroacetyl chloride (10.8 mL, 0.136 mol) was heated at 110 °C for 30 minutes, whereupon the reaction mixture solidified. After cooling to room temperature, the residue was triturated with diethyl ether (25 mL) to yield a pale yellow solid, which was collected by filtration. The solid was then placed in a flask with triethylphosphite (44 mL, 0.259 mol), and heated at 80 °C under a N<sub>2</sub> atmosphere for 48 hours. After cooling to room temperature, the solid residue was washed with n-hexane to remove the excess phosphite reagent, and may be used in the next step without further purification.

**Methyl carbamate phosphonate ester, 3a** (R = Me, white solid, 87% yield, over 2 steps). mp 45-47 °C;  $\delta_{\text{H}}$  (270 MHz, CDCl<sub>3</sub>) 9.09 (1H, br s, NH), 4.20 - 4.10 (4H, m, 2 × OCH<sub>2</sub>), 3.74 (3H, s, OCH<sub>3</sub>), 3.30 (2H, d,  $J$  24 Hz, CH<sub>2</sub>), 1.36-1.21 (6H, m, 2 × CH<sub>3</sub>).  $\delta_{\text{C}}$  (67.5 MHz, CDCl<sub>3</sub>) 164.7, 151.8, 63.5 (d,  $J$  6.5 Hz), 52.8, 35.9 (d,  $J$  131 Hz), 16.2 (d,  $J$  6.5 Hz).  $m/z$  (EI) 253 (M<sup>+</sup>, 100%), 131 (99), 105 (100), 77 (58).

**Benzyl carbamate phosphonate ester, 3b** (R = Bn, off-white solid, 88% yield over 2 steps). mp 101-102 °C;  $\delta_{\text{H}}$  (400 MHz, CDCl<sub>3</sub>) 9.60 (1H, br. s, NH), 7.32 (5H, d,  $J$  6.8 Hz, ArH), 5.13 (2H, s, CH<sub>2</sub>Ph), 4.07 (4H, q,  $J$  7.2 Hz, CH<sub>2</sub>CH<sub>3</sub>), 3.26 (2H, d,  $J$  = 22.0 Hz, CH<sub>2</sub>P), 1.28 (6H, t,  $J$  7.1 Hz, CH<sub>2</sub>CH<sub>3</sub>);  $\delta_{\text{C}}$  (100.6 MHz, CDCl<sub>3</sub>) 164.6, 151.2, 135.0, 128.6, 128.5, 128.4, 67.7, 62.9 (d,  $J$  6.8

H<sub>z</sub>), 35.9 (d, *J* 130 Hz), 16.2 (d, *J* 6.8 Hz); *m/z* (EI) 329 (M<sup>+</sup>, 30%), 222 (23), 195 (32), 179 (49), 152 (58), 91 (100).

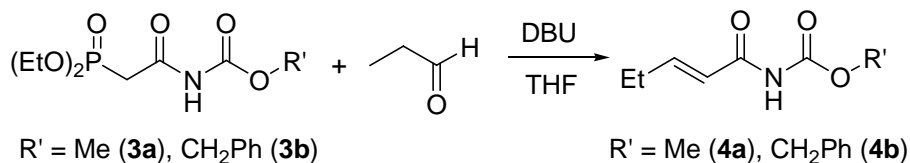

**The HWE reaction:** DBU (6.6 mL, 43.5 mmol) and propionaldehyde (3.2 mL, 43.5 mmol) were added successively to a solution of the phosphonate imide **3a** (11 g, 43.5 mmol) in THF (50 mL), with cooling in a water bath. Upon completion (TLC, *ca.* 8-12 h), the reaction mixture was diluted with ethyl acetate (400 mL) and water (200 mL). The aqueous phase was extracted twice with ethyl acetate (2 × 200 mL) and the combined organic extracts were washed with brine (200 mL) and dried over MgSO<sub>4</sub>. Concentration under vacuum gave **4a** as a pale yellow solid, which was recrystallised from EtOAc/hexane, giving the product as white crystals (6.5 g, 95% yield). mp 87-88°C; δ<sub>H</sub> (270 MHz, CDCl<sub>3</sub>) 7.84 (1H, s br, NH), 7.20 (1H, dt, *J* 6.5, 16 Hz, EtCH=CH), 6.82 (1H, dt, *J* 1.5, 16 Hz, CH=CHCO), 3.78 (3H, s, OCH<sub>3</sub>), 2.30 (2H, m, CH<sub>2</sub>), 1.08 (3H, t, *J* 7.5 Hz, CH<sub>3</sub>); δ<sub>C</sub> (100 MHz, CDCl<sub>3</sub>) 166.2 (C=O), 152.9 (CH), 152.4 (C=O), 120.3 (CH), 53.0 (CH<sub>3</sub>), 25.7 (CH<sub>2</sub>), 12.1 (CH<sub>3</sub>); *m/z* (EI) 157 (M<sup>+</sup>, 25%), 83 (65), 82 (100), 55 (35).

**4b** was similarly prepared similarly from **3b** as a white solid (88%). Recrystallised from EtOAc/hexane, or column chromatography (EtOAc/*n*-hexane, 1:1, *R<sub>f</sub>* = 0.71); mp 96-97 °C; ν<sub>max</sub>(KBr)/cm<sup>-1</sup> 3268, 1713, 1670, 1603 and 1420; δ<sub>H</sub> (400 MHz, CDCl<sub>3</sub>) 8.07 (1H, br. s, NH), 7.38 (5H, m, ArH), 7.26 (1H, dq, *J* 15.3 and 7.5, CH<sub>2</sub>CH), 6.80 (1H, d, *J* 15.3, COCH), 5.20 (2H, CH<sub>2</sub>Ph), 2.28-2.38 (2H, m, CH<sub>3</sub>CH<sub>2</sub>), 1.10 (3H, t, *J* 7.5, CH<sub>3</sub>CH<sub>2</sub>); δ<sub>C</sub> (100.6 MHz, CDCl<sub>3</sub>) 166.0 (C=O), 152.9 (C=O), 151.6 (1C, CH), 135.1 (1C, C), 128.7 (CH), 128.6 (1C, CH), 128.4 (2C, CH), 120.4 (1C, CH), 67.9 (CH<sub>2</sub>), 25.7 (1C, CH<sub>2</sub>), 12.1 (1C, CH<sub>3</sub>); *m/z* (EI) 233 (M<sup>+</sup>, 40%), 179 (30), 152 (32), 132 (45), 127 (65), 91 (100).

**Aza-Michael reaction (reaction optimization/catalyst screening):** Reaction optimisation was performed in a Radley's 12-placed reaction carousel, equipped with magnetic stirring and temperature control. A reaction tube was charged with the corresponding ligand (1.1 equiv. wrt Pd) and Pd(OTf)<sub>2</sub>·2H<sub>2</sub>O (9.3 mg, 5 mol%, 0.02 mmol). The reaction tube was placed in the carousel and flushed with a nitrogen atmosphere, before the addition of anhydrous toluene (1 mL). The solution was allowed to stir for an hour at ambient temperature to generate the active catalyst. A solution of

the substrates – **4a** (100 mg, 0.636 mmol) and 4-(trifluoromethyl)aniline (53  $\mu$ L, 0.424 mmol) were then added, followed by the addition of toluene, to attain the desired dilution. The temperature was obtained and maintained by adjustment of the thermostat, whereupon the reaction mixture was left for 72 hours. It was then filtered through a short column of silica gel, and evaporation of the solvent furnished a viscous residue, which was analysed by  $^1\text{H}$  NMR spectroscopy and chiral HPLC.

**Table S1. Reaction optimisation 1: Dilution, reaction temperature and catalyst loading.**

| Entry | Ligand          | [ <b>4a</b> ] / M | [Pd] /mol% | Temp/ $^{\circ}\text{C}$ | Yield /% <sup>a</sup> | ee/% <sup>b</sup> |
|-------|-----------------|-------------------|------------|--------------------------|-----------------------|-------------------|
| 1     | <i>R</i> -BINAP | 0.3               | 5          | rt                       | 57                    | 84                |
| 2     | <i>R</i> -BINAP | 0.2               | 5          | rt                       | 55                    | 85                |
| 3     | <i>R</i> -BINAP | 0.16              | 5          | rt                       | 52                    | 88                |
| 4     | <i>R</i> -BINAP | 0.6               | 2          | rt                       | 25                    | 79                |
| 5     | <i>R</i> -BINAP | 0.4               | 2          | rt                       | 26                    | 81                |
| 6     | <i>R</i> -BINAP | 0.3               | 2          | rt                       | 25                    | 82                |
| 7     | <i>R</i> -BINAP | 0.16              | 5          | 50                       | 75                    | 85                |
| 8     | <i>R</i> -BINAP | 0.1               | 5          | 50                       | 68                    | 88                |
| 9     | <i>R</i> -BINAP | 0.08              | 5          | 50                       | 64                    | 91                |
| 10    | <i>R</i> -BINAP | 0.3               | 2          | 50                       | 62                    | 79                |
| 11    | <i>R</i> -BINAP | 0.2               | 2          | 50                       | 62                    | 81                |
| 12    | <i>R</i> -BINAP | 0.16              | 2          | 50                       | 52                    | 86                |
| 13    | <i>R</i> -BINAP | 0.1               | 2          | 50                       | 48                    | 88                |
| 14    | <i>R</i> -BINAP | 0.08              | 2          | 50                       | 35                    | 91                |
| 15    | <i>R</i> -BINAP | 0.06              | 2          | 50                       | 33                    | 89                |

Reaction conditions: 2-5 mol% catalyst, 3 days, 1.5 equiv. **4a** : 1 equiv. amine, alkene **4a** (100 mg, 0.63 mmol); <sup>a</sup> Calculated by  $^1\text{H}$  NMR; <sup>b</sup> Determined by chiral HPLC, (-)-(*S*)-enantiomer predominates in all cases.

**Table S2. Reaction optimisation 2: Solvent and substrate ratio.**

| Entries        | Solvent | Substrate ratio <sup>a</sup> | % yield <sup>b</sup> | %ee <sup>c</sup> |
|----------------|---------|------------------------------|----------------------|------------------|
| 1              | Toluene | 1.5 : 1                      | 52                   | 85               |
| 2              | THF     | 1.5 : 1                      | 14                   | -                |
| 3              | DCM     | 1.5 : 1                      | 30                   | 69               |
| 4              | MeOH    | 1.5 : 1                      | 13                   | -                |
| 5              | DME     | 1.5 : 1                      | 17                   | -                |
| 6              | Dioxane | 1.5 : 1                      | 12                   | -                |
| 7              | Toluene | 1 : 1                        | 78                   | 85               |
| 8              | Toluene | 1 : 1.5                      | 55                   | 87               |
| 9 <sup>d</sup> | Toluene | 1 : 1.5                      | 85                   | 88               |

Reaction conditions: Unless otherwise stated, 5 mol% catalyst, [**4a**] = 0.2 M, RT, 3 days; <sup>a</sup>**4a** : aniline. <sup>b</sup>Calculated by  $^1\text{H}$  NMR; <sup>c</sup>Determined by chiral HPLC. (-)-(*S*)-Enantiomer predominates in all cases. <sup>d</sup>At 50  $^{\circ}\text{C}$ , with 0.08 M substrate.

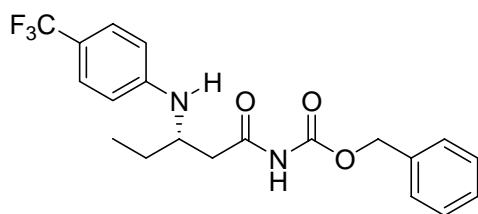

**(S)-N-[3-(4-trifluoromethyl-phenylamino)-pentanoyl]benzyl carbamate, 2b.** Obtained using (*R*)-BINAP as the chiral phosphine. White solid, 79% yield.  $R_f = 0.23$  (Et<sub>2</sub>O/*n*-pentane, 1:2); mp 99-100 °C (lit.<sup>2</sup> 100.6-101.4 °C).  $[\alpha]_D^{25} -18.5^\circ$  ( $c = 0.01$  g/mL in CHCl<sub>3</sub>, 86% ee); Daicel Chiralpak AD, 10% IPA in *n*-hexane, flow rate: 1.0 mL/min,  $t_R = 21.9$  (*R*-isomer) and 24.8 (*S*-isomer) min;  $\nu_{\max}(\text{KBr})/\text{cm}^{-1}$  3367, 3215, 1727, 1677, 1601, 1456, 819 and 704;  $\delta_H$  (400 MHz, CDCl<sub>3</sub>) 7.89 (1H, br. s, CONH), 7.39 (7H, m, ArH), 6.59 (2H, d,  $J$  8.4, ArH), 5.19 (2H, s, CH<sub>2</sub>Ph), 4.24 (1H, br. s, ArNH), 3.91-3.94 (1H, m, CH), 3.77 (3H, s, OCH<sub>3</sub>), 3.12 (1H, dd,  $J$  15.9 and 6.9 Hz, CH<sub>2</sub>CO), 3.00 (1H, dd,  $J$  15.9 and 5.4 Hz, CH<sub>2</sub>CO), 1.62-1.75 (2H, m, CH<sub>3</sub>CH<sub>2</sub>), 0.99 (3H, t,  $J$  6.9 Hz, CH<sub>3</sub>CH<sub>2</sub>);  $\delta_C$  (100.6 MHz, CDCl<sub>3</sub>) 173.0 (C=O), 151.8 (C=O), 149.9 (C), 134.8 (C), 129.0 (CH), 128.8 (CH), 128.4 (CH), 126.7 (CH), 125.0 (q,  $J$  270 Hz, CF<sub>3</sub>), 118.6 (1C, q,  $J$  33 Hz, CH), 111.2 (CH), 68.1 (CH<sub>2</sub>), 51.3 (CH), 40.0 (CH<sub>2</sub>), 27.9 (CH<sub>2</sub>), 10.5 (CH<sub>3</sub>);  $m/z$  (EI) 394 ( $M^+$ , 30%), 365 (22), 257 (18), 214 (25), 202 (75), 172 (29), 91 (100).

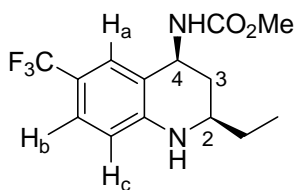

**(2*R*,4*S*)-(2-Ethyl-6-trifluoromethyl-1,2,3,4-tetrahydroquinolin-4-yl)carbamic acid methyl ester, 5.** The acyclic precursor (*R*)-**5** (190 mg, 0.60 mmol) was dissolved in 95% aq. EtOH (5 mL) with stirring. Sodium borohydride (17 mg, 0.45 mmol) was then added in one portion. At the cessation of effervescence, the solution was cooled to -10 °C, and a solution of MgCl<sub>2</sub>·6H<sub>2</sub>O (135 mg, 0.66 mmol) in water (0.5 mL) was added dropwise via syringe. The mixture was then warmed to 0 °C, and stirring was continued for 2 h. The reaction was quenched by the addition of CH<sub>2</sub>Cl<sub>2</sub> (5 mL) and dilute HCl (1M, 5 mL) at 0 °C. The layers were separated at room temperature, and the aqueous layer was extracted with further portions of CH<sub>2</sub>Cl<sub>2</sub> (2 x 5 mL). The combined organic extracts were washed with H<sub>2</sub>O (5 mL), brine (10 mL) and dried over Na<sub>2</sub>SO<sub>4</sub>. Evaporation of the solvent yielded the cyclic product **5** as a white solid, which was dried under vacuum at 50 °C overnight (166 mg, 92%). The compound was of sufficient purity to be employed in the next step without further purification. For analytical purposes, a small sample was purified by column chromatography on flash silica gel (30% ethyl acetate in hexane). m.p. 124-125.5 °C (lit.<sup>2</sup> 139.0-140.5 °C, recryst. from CH<sub>2</sub>Cl<sub>2</sub>-hexane).  $\delta_H$  (500 MHz, CDCl<sub>3</sub>) 7.39 (1H, s, H<sub>a</sub>), 7.24 (1H, d,  $J$  8.2

Hz, H<sub>b</sub>), 6.49 (1H, d, *J* 8.2 Hz, H<sub>c</sub>), 5.02 (1H, td, *J* 6.0, 9.6 Hz, H<sub>4</sub>), 4.81 (1H, d, *J* 9.6 Hz, NH), 4.10 (1H, br. s, NH), 3.77 (3H, s, OCH<sub>3</sub>), 3.47-3.40 (1H, m, H<sub>2</sub>), 2.34 (1H, ddd, *J* 2.4, 6.0, 12.3 Hz, H<sub>3</sub>), 1.42-1.53 (3H, m, H<sub>3</sub>' and CH<sub>2</sub>CH<sub>3</sub>), 1.01 (3H, t, *J* 7.5 Hz, CH<sub>2</sub>CH<sub>3</sub>). δ<sub>C</sub> (100.6 MHz, CDCl<sub>3</sub>) 157.0 (C=O), 147.4 (C), 125.5 (q, *J* 3 Hz, CH), 123.8 (q, *J* 3 Hz, CH), 124.8 (q, *J* 270 Hz, CF<sub>3</sub>), 113.4 (CH), 52.3 (CH), 52.2 (OMe), 47.9 (CH), 35.2 (CH<sub>2</sub>), 29.0 (CH<sub>2</sub>), 9.6 (CH<sub>3</sub>); *m/z* (ESI+) 303.1310 (MH<sup>+</sup>), C<sub>14</sub>H<sub>18</sub>N<sub>2</sub>O<sub>2</sub>F<sub>3</sub> requires 303.1320.

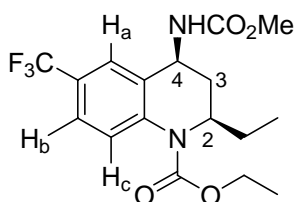

**(2*R*,4*S*)-2-Ethyl-4-methoxycarbonylamino-6-trifluoromethyl-3,4-dihydro-2H-quinoline-1-**

**carboxylic acid ethyl ester, 6.** A 3-necked round-bottom flask equipped with a nitrogen inlet and a condenser was charged with a magnetic stirrer bar, the tetrahydroquinoline **7** (110 mg, 0.36 mmol), anhydrous pyridine (150 μL, 1.95 mmol.) and dry CH<sub>2</sub>Cl<sub>2</sub> (5 mL). The mixture was cooled to 0 °C, before the addition of ethyl chloroformate (180 μL, 1.80 mmol), causing the the development of a red colour solution. Stirring was continued at 0 °C for 30 min, then at room temperature for a further 2 h, during which the colour of the solution slowly discharged to light yellow. Excess chloroformate was destroyed by the addition of 1M aq. NaOH (2 mL) at 0 °C. The layers were separated, and the aqueous layer was extracted with CH<sub>2</sub>Cl<sub>2</sub> (5 mL). The organic extracts were washed with dilute HCl (1M, 3 mL) and brine, dried over Na<sub>2</sub>SO<sub>4</sub>, and evaporated to dryness. Trituration of the residue furnished the required product as a white solid (111 mg, 82%). m.p. 153-155 °C (lit.<sup>2</sup> 157.3-157.6 °C). δ<sub>H</sub> (500 MHz, CDCl<sub>3</sub>, 55 °C) 7.58 (1H, d, *J* 8.0 Hz, H<sub>b</sub>), 7.49 (1H, d, *J* 8.0 Hz, H<sub>c</sub>), 7.49 (1H, s, H<sub>a</sub>), 4.88 (1H, br. d, *J* 9.0 Hz, NH), 4.80 (1H, ddd, *J* 5.0, 9.0, 10.0 Hz, H<sub>4</sub>), 4.48 (1H, m, H<sub>2</sub>), 4.17-4.29 (2H, m, OCH<sub>2</sub>CH<sub>3</sub>), 2.54 (1H, ddd, *J* 5.0, 8.0, 13.0 Hz, H<sub>3</sub>), 1.61-1.66 (1H, m, CH<sub>2</sub>CH<sub>3</sub>), 1.49-1.57 (1H, m, H<sub>3</sub>'), 1.43-1.49 (1H, m, CH<sub>2</sub>CH<sub>3</sub>), 1.30 (3H, t, *J* 7.5 Hz, OCH<sub>2</sub>CH<sub>3</sub>), 0.86 (3H, t, *J* 7.5 Hz, CH<sub>2</sub>CH<sub>3</sub>). δ<sub>C</sub> (125.7 MHz, CDCl<sub>3</sub>) 156.4 (C=O), 154.4 (C=O), 139.4 (C), 134.12 (C), 126.26 (q, *J* 33 Hz, C), 126.2 (CH), 124.3 (q, *J* 4 Hz, CH), 124.0 (q, *J* 272 Hz, CF<sub>3</sub>), 120.7 (q, *J* 4 Hz, CH), 62.2 (CH<sub>2</sub>O), 53.4 (OMe), 52.6 (CH), 46.7 (CH), 37.9 (CH<sub>2</sub>), 28.2 (CH<sub>2</sub>), 14.4 (CH<sub>3</sub>), 9.8 (CH<sub>3</sub>); *m/z* (CI+) 392 (MNH<sub>4</sub><sup>+</sup>, 100%), *m/z* (ESI+) 397.1356 (MNa<sup>+</sup>), C<sub>17</sub>H<sub>21</sub>N<sub>2</sub>O<sub>4</sub>F<sub>3</sub>Na requires 397.1351.

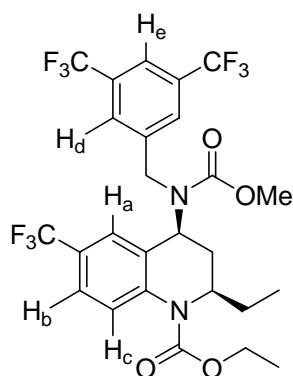

(2*R*,4*S*)-4-[(3,5-*Bis*(trifluoromethyl)benzyl)methoxycarbonylamino]-2-ethyl-6-trifluoromethyl-3,4-dihydro-2*H*-quinoline-1-carboxylic acid ethyl ester, **1** (**Torcetrapib**). A 2-neck round bottom flask was charged with a magnetic stirrer bar, compound **7** (108 mg, 0.29 mmol.) and potassium *tert*-butoxide (35 mg, 0.31 mmol.) under an N<sub>2</sub> atmosphere. Dry CH<sub>2</sub>Cl<sub>2</sub> (1.5 mL) was added, and the solution was stirred at room temperature for 5 min to generate a yellow solution, before the addition of 3,5-*bis*(trifluoromethyl)benzyl bromide (54 μL, 0.29 mmol.). Stirring was continued for 4 h, whereupon a suspension was formed. CH<sub>2</sub>Cl<sub>2</sub> (10 mL) and water (5 mL) were added, and the layers were separated. The aqueous layer was further extracted with CH<sub>2</sub>Cl<sub>2</sub> (2 x 5 mL) and the combined organic extract was dried (MgSO<sub>4</sub>) and evaporated. The product was initially obtained as a sticky residue after column chromatography, which turned into a foamy white solid after it was triturated with *n*-hexane and dried under vacuum (90 mg, 52%), *R*<sub>f</sub> = 0.44 (EtOAc/hexane, 1: 4). m.p. 54-56 °C [lit. (monoethanolate):<sup>1</sup> mp 54-58 °C]. δ<sub>H</sub> (500 MHz, CDCl<sub>3</sub>, 55 °C) 7.80 (1H, s, H<sub>e</sub>), 7.74 (2H, s, H<sub>d</sub>), 7.59 (1H, d, *J* 8.0 Hz, H<sub>b</sub>), 7.52 (1H, d, *J* 8.0 Hz, H<sub>c</sub>), 7.14 (1H, s, H<sub>a</sub>), 4.8-5.2 (2H, br., CH<sub>2</sub>N and H<sub>4</sub>), 4.32-4.38 (1H, m, H<sub>2</sub>), 4.17-4.30 (3H, m, CH<sub>2</sub>O and CH<sub>2</sub>N), 3.81 (3H, br. s, OMe), 2.27 (1H, br. s, H<sub>3</sub>), 1.63-1.72 (1H, m, CH<sub>2</sub>CH<sub>3</sub>), 1.40-1.49 (2H, m H<sub>3</sub>' and CH<sub>2</sub>CH<sub>3</sub>), 1.30 (3H, t, *J* 7.5 Hz, CH<sub>3</sub>CH<sub>2</sub>O), 0.75 (3H, br. t, *J* 7.2 Hz, CH<sub>3</sub>CH<sub>2</sub>); δ<sub>C</sub> (125.7 MHz, CDCl<sub>3</sub>, 55 °C) 157.3 (br. s, C=O), 154.4 (C=O), 141.6 (br. s, C), 133.5 (br. s, C), 132.3 (q, *J* 34 Hz, C), 127.3 (CH, CH<sub>d</sub>), 126.9 (CH, CH<sub>b</sub>), 126.7 (br. q, *J* 33 Hz, C), 124.4 (CH, CH<sub>c</sub>), 124.1 (q, *J* 273 Hz, CF<sub>3</sub>), 123.2 (q, *J* 273 Hz, CF<sub>3</sub>), 121.5 (CH, CH<sub>e</sub>), 119.6 (CH, CH<sub>a</sub>), 62.3 (CH<sub>2</sub>O), 54.4 (CH, C<sub>2</sub>), 53.5 (br. s, OMe), 47.0 (br. s, CH, C<sub>4</sub>), 36.8 (br. s, CH<sub>2</sub>, C<sub>3</sub>), 29.1 (CH<sub>3</sub>CH<sub>2</sub>), 14.3 (OCH<sub>2</sub>CH<sub>3</sub>), 9.3 (CH<sub>3</sub>CH<sub>2</sub>). δ<sub>F</sub> (376.5 MHz, CDCl<sub>3</sub>, 55 °C) -61.3 (1F), -62.1 (2F). *m/z* (CI<sup>+</sup>) 618 (MNH<sub>4</sub><sup>+</sup>), *m/z* (ESI<sup>+</sup>) 601.1758 (MH<sup>+</sup>), C<sub>26</sub>H<sub>26</sub>N<sub>2</sub>O<sub>4</sub>F<sub>9</sub> requires 601.1749.

## References

1. Damon, D. B.; Dugger, R. W.; Magnus-Aryitey, G.; Ruggeri, R. B.; Wester, R. T.; Tu, M.; Abramov, Y. *Org. Process Res. & Dev.* **2006**, *10*, 464-471.

---

2. Damon, D. B.; Dugger, R. W.; Hubbs, S. E.; Scott, J. M.; Scott, R. W. *Org. Process Res. & Dev.*

**2006**, *10*, 472-480.



**Fig. S1.**  $^1\text{H}$  NMR spectrum of methyl carbamate phosphonate ester **3a**

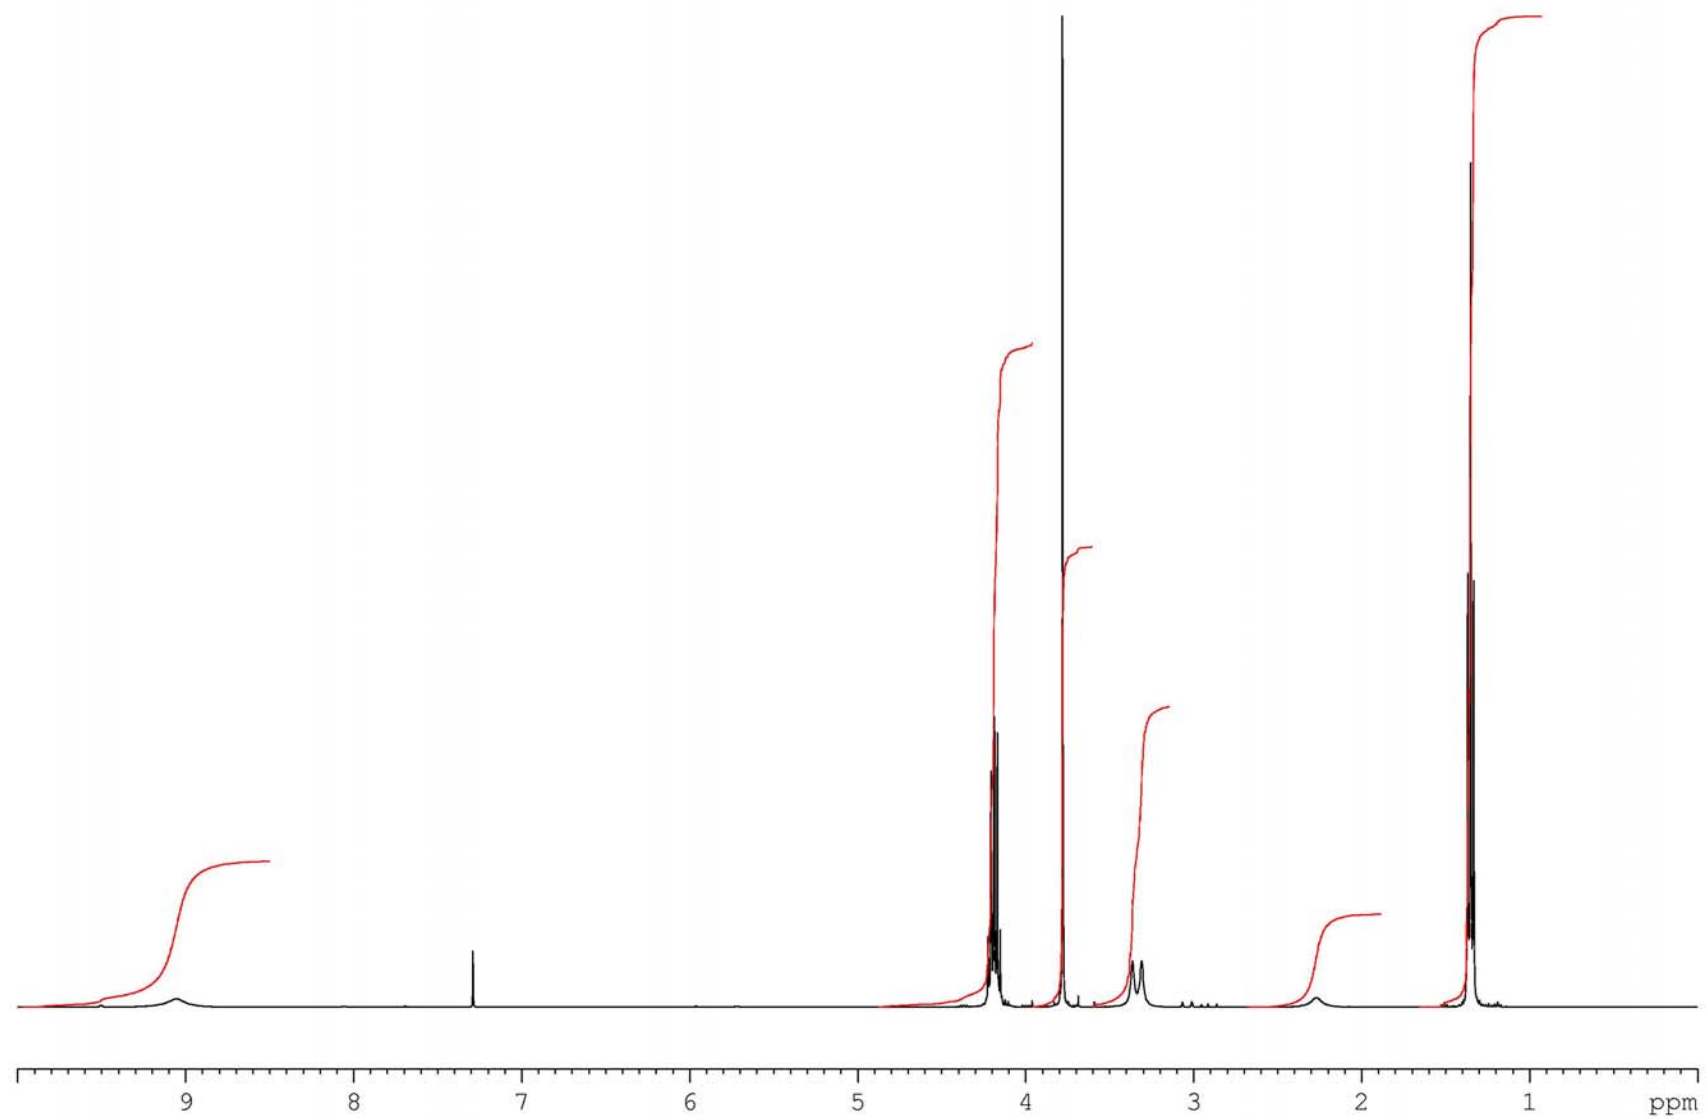

**Fig. S2.**  $^{13}\text{C}$  NMR spectrum of methyl carbamate phosphonate ester **3a**

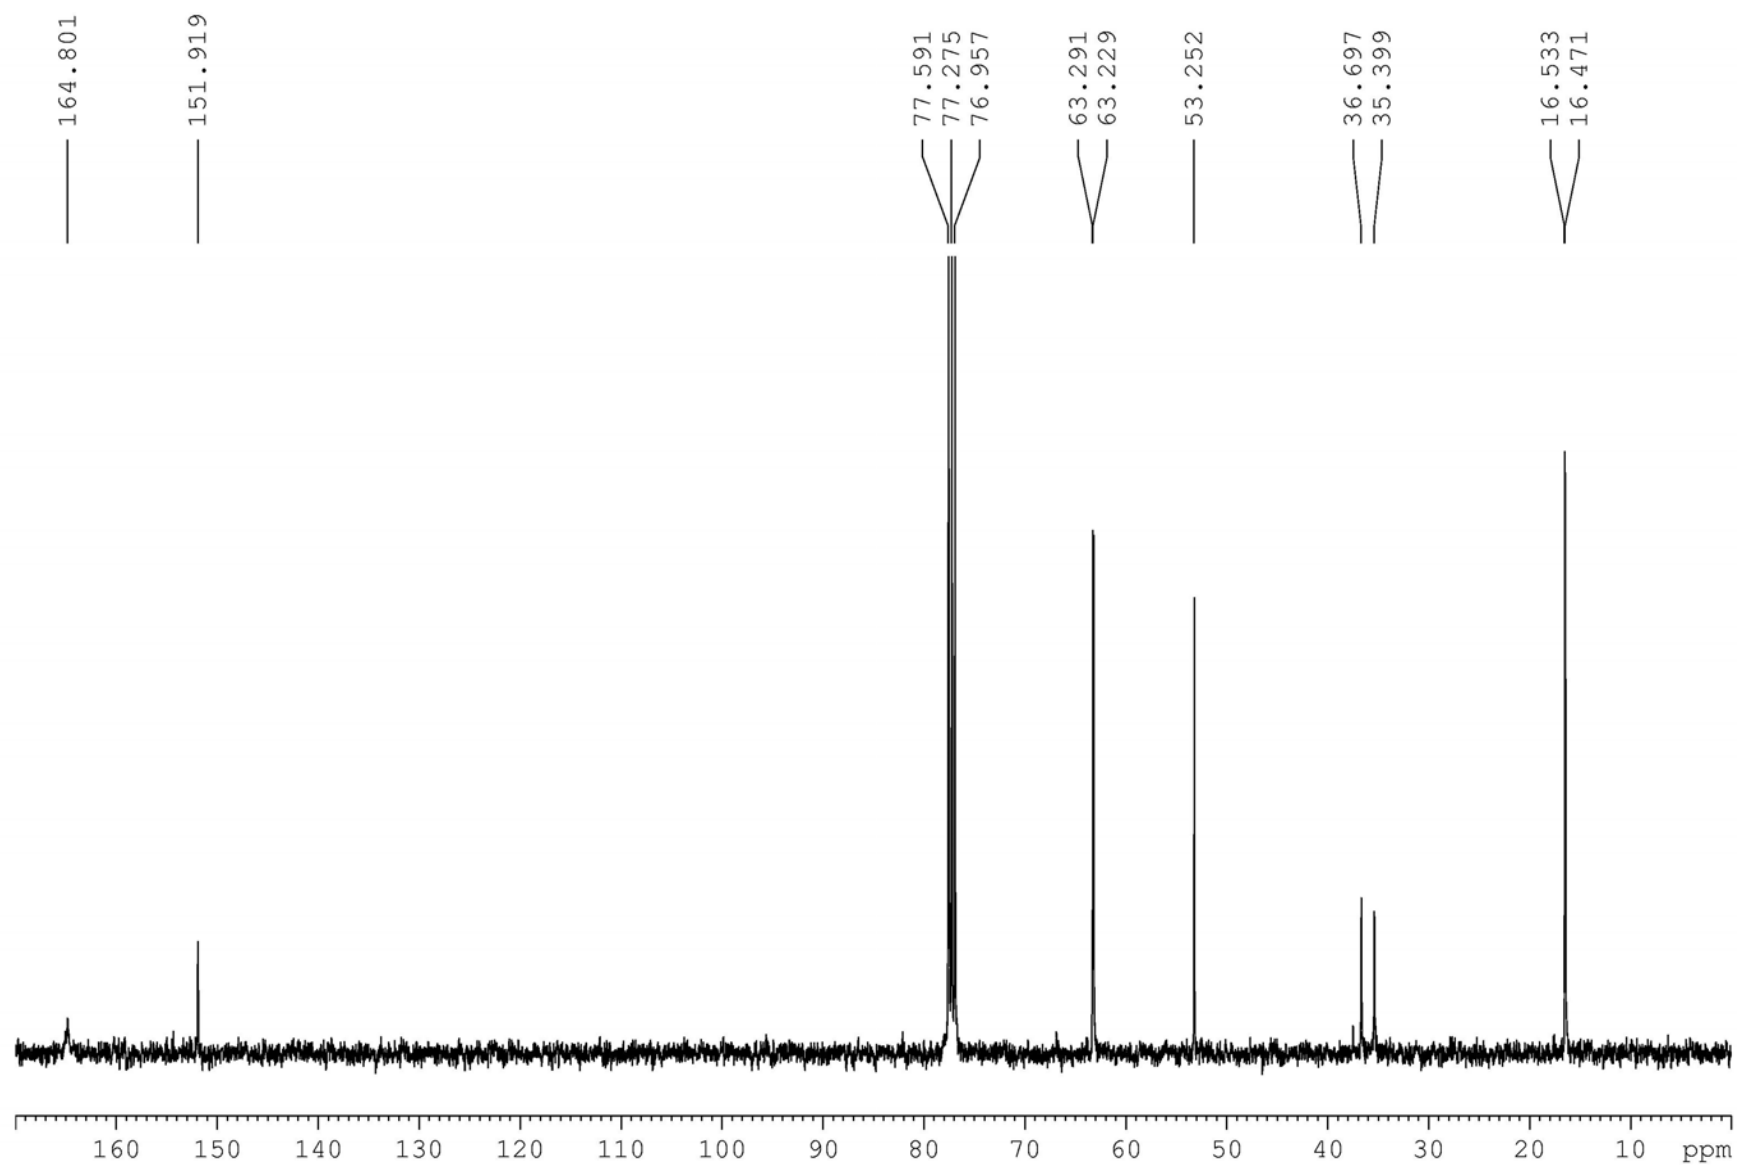

**Fig. S3.**  $^1\text{H}$  NMR spectrum of benzyl carbamate phosphonate ester **3b**

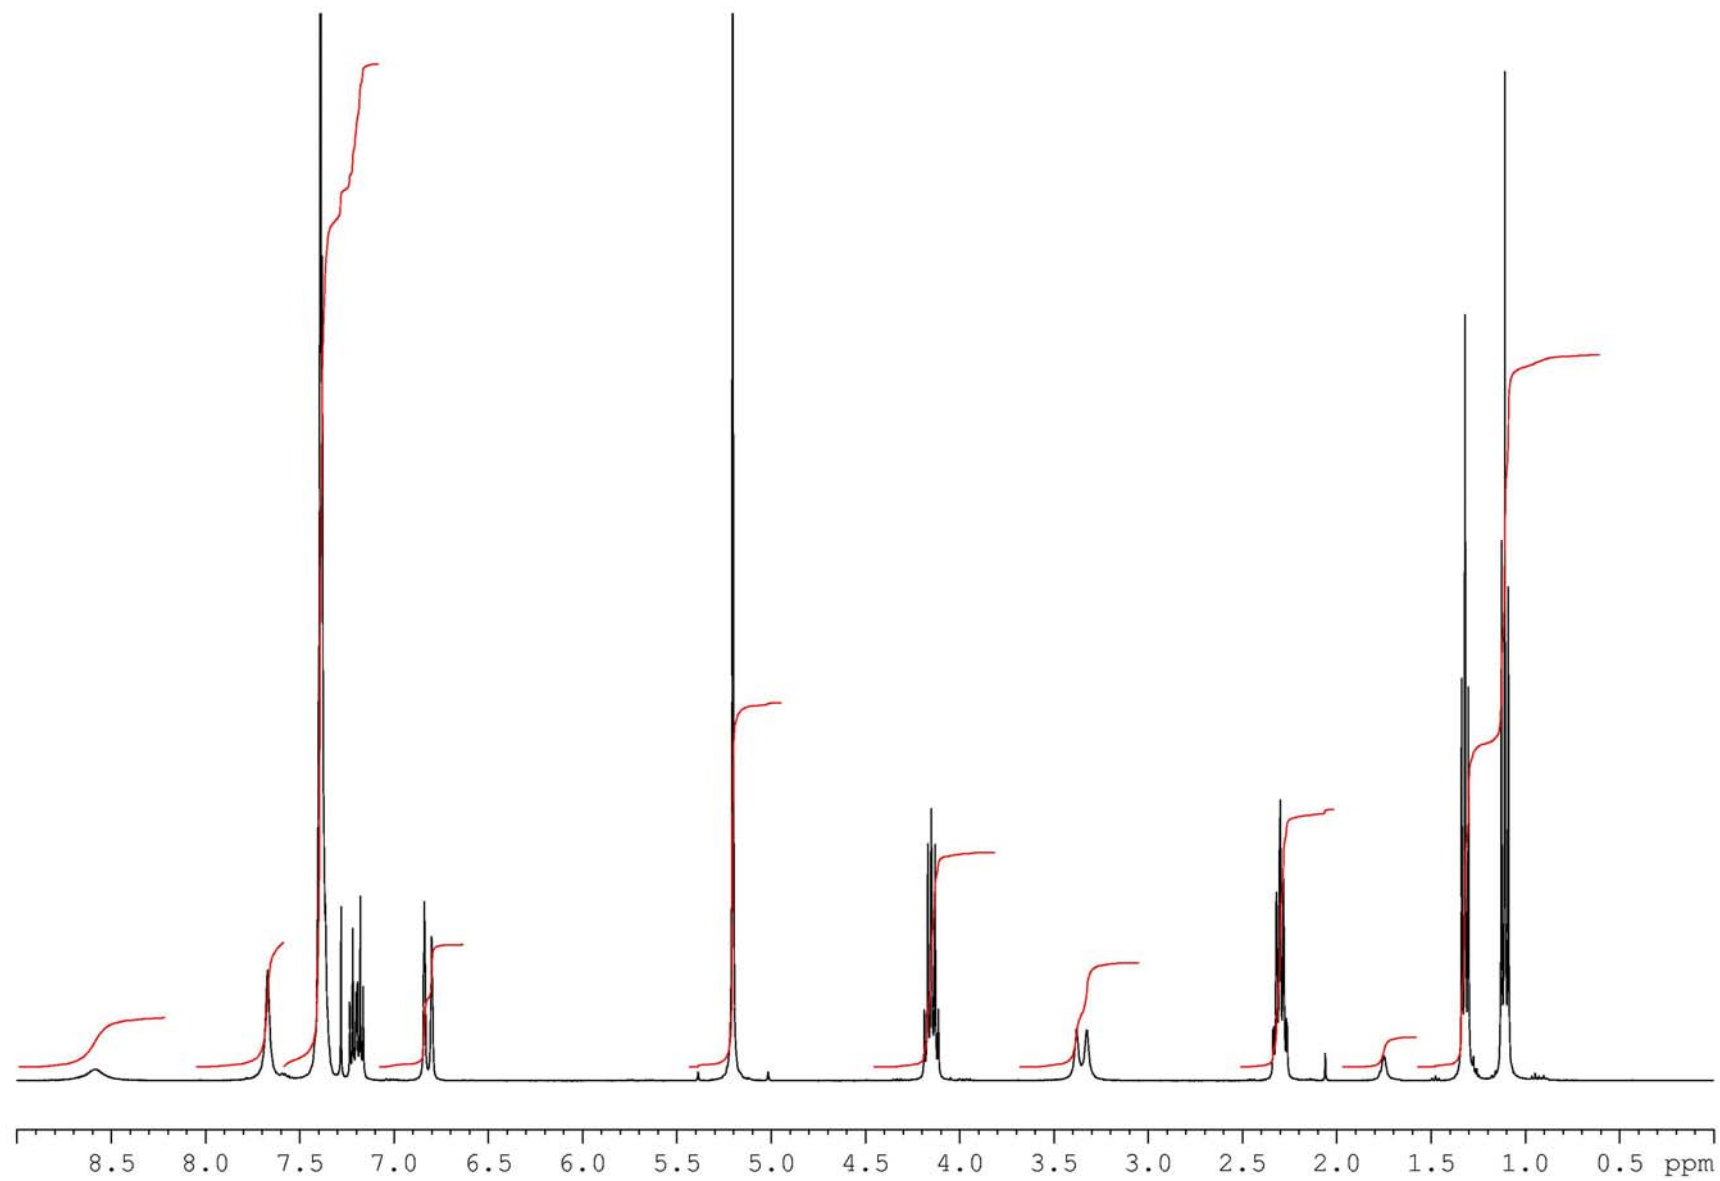

**Fig. S4.**  $^{13}\text{C}$  NMR spectrum of benzyl carbamate phosphonate ester **3b**

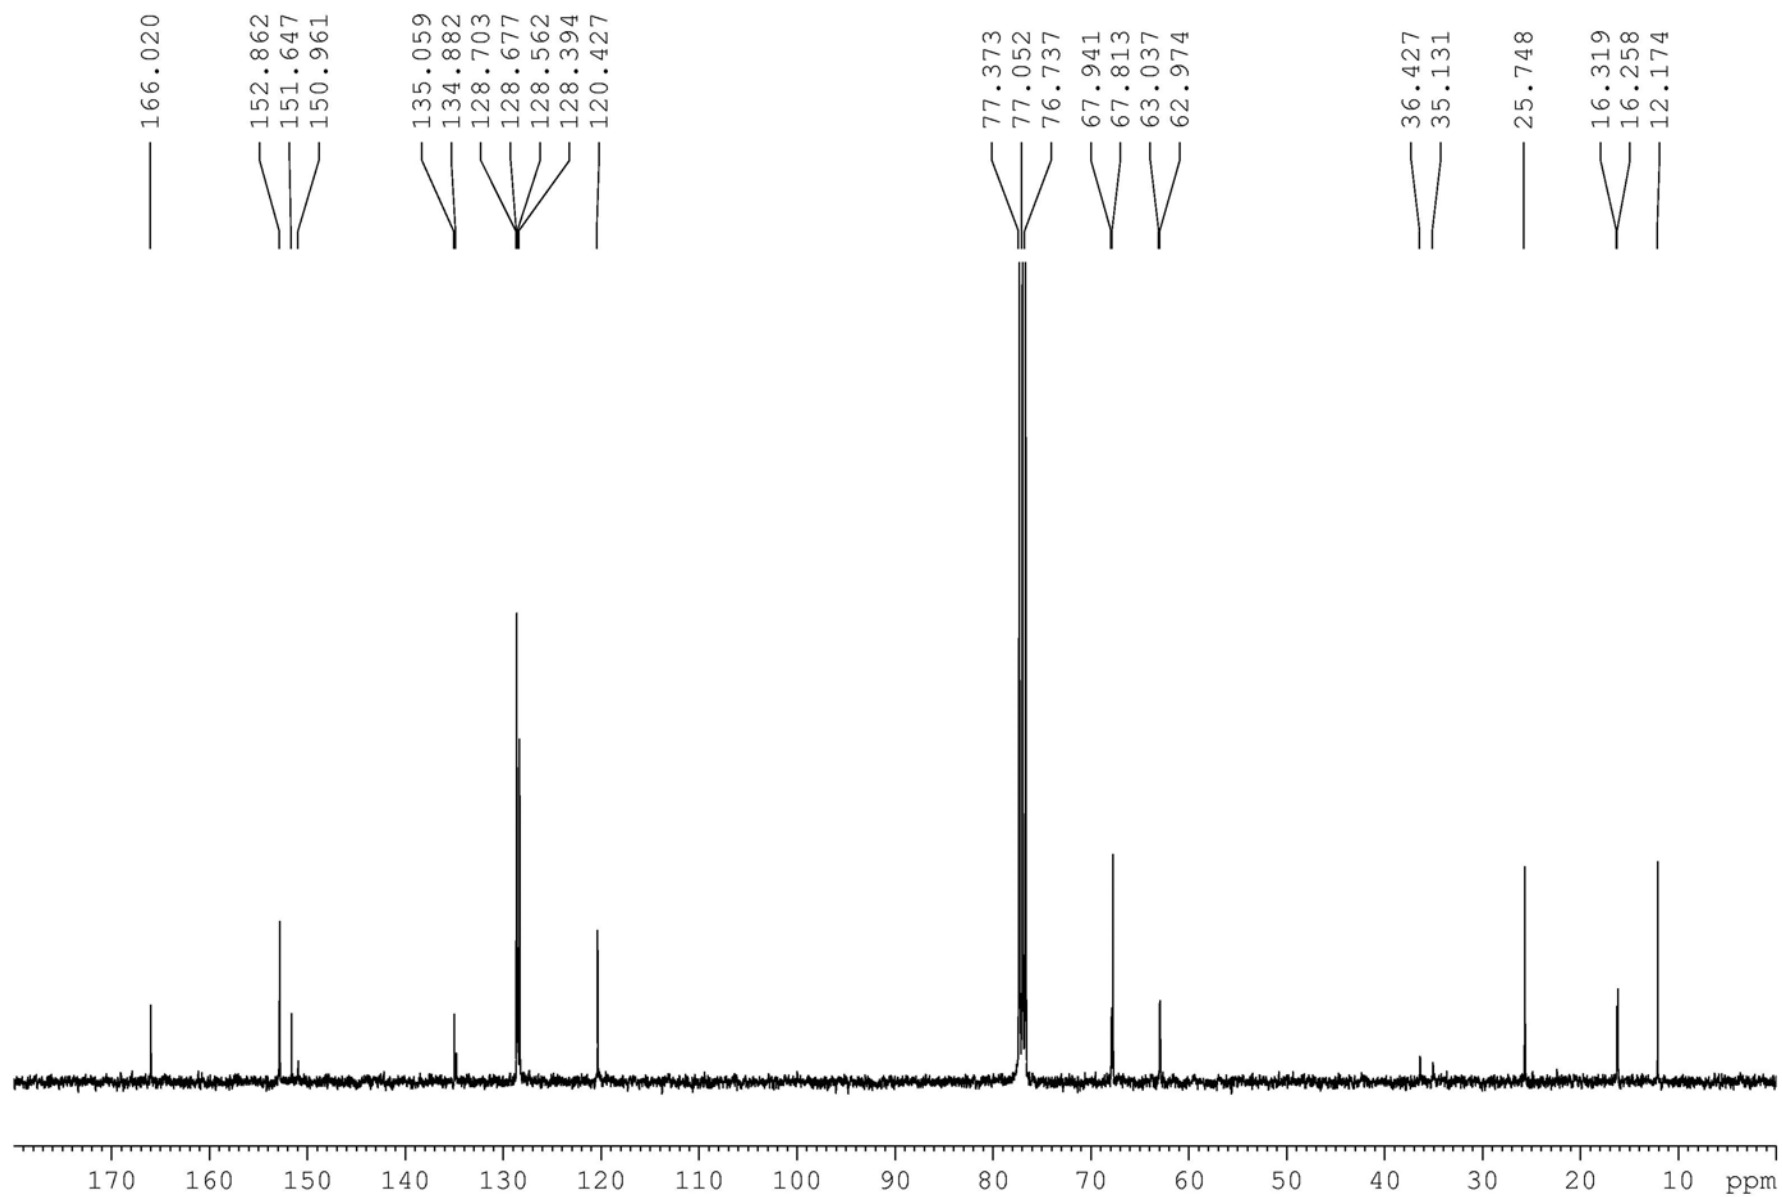

Fig. S5.  $^1\text{H}$  NMR spectrum of *N*-(Pent-2-enoyl)methyl carbamate, **4a**

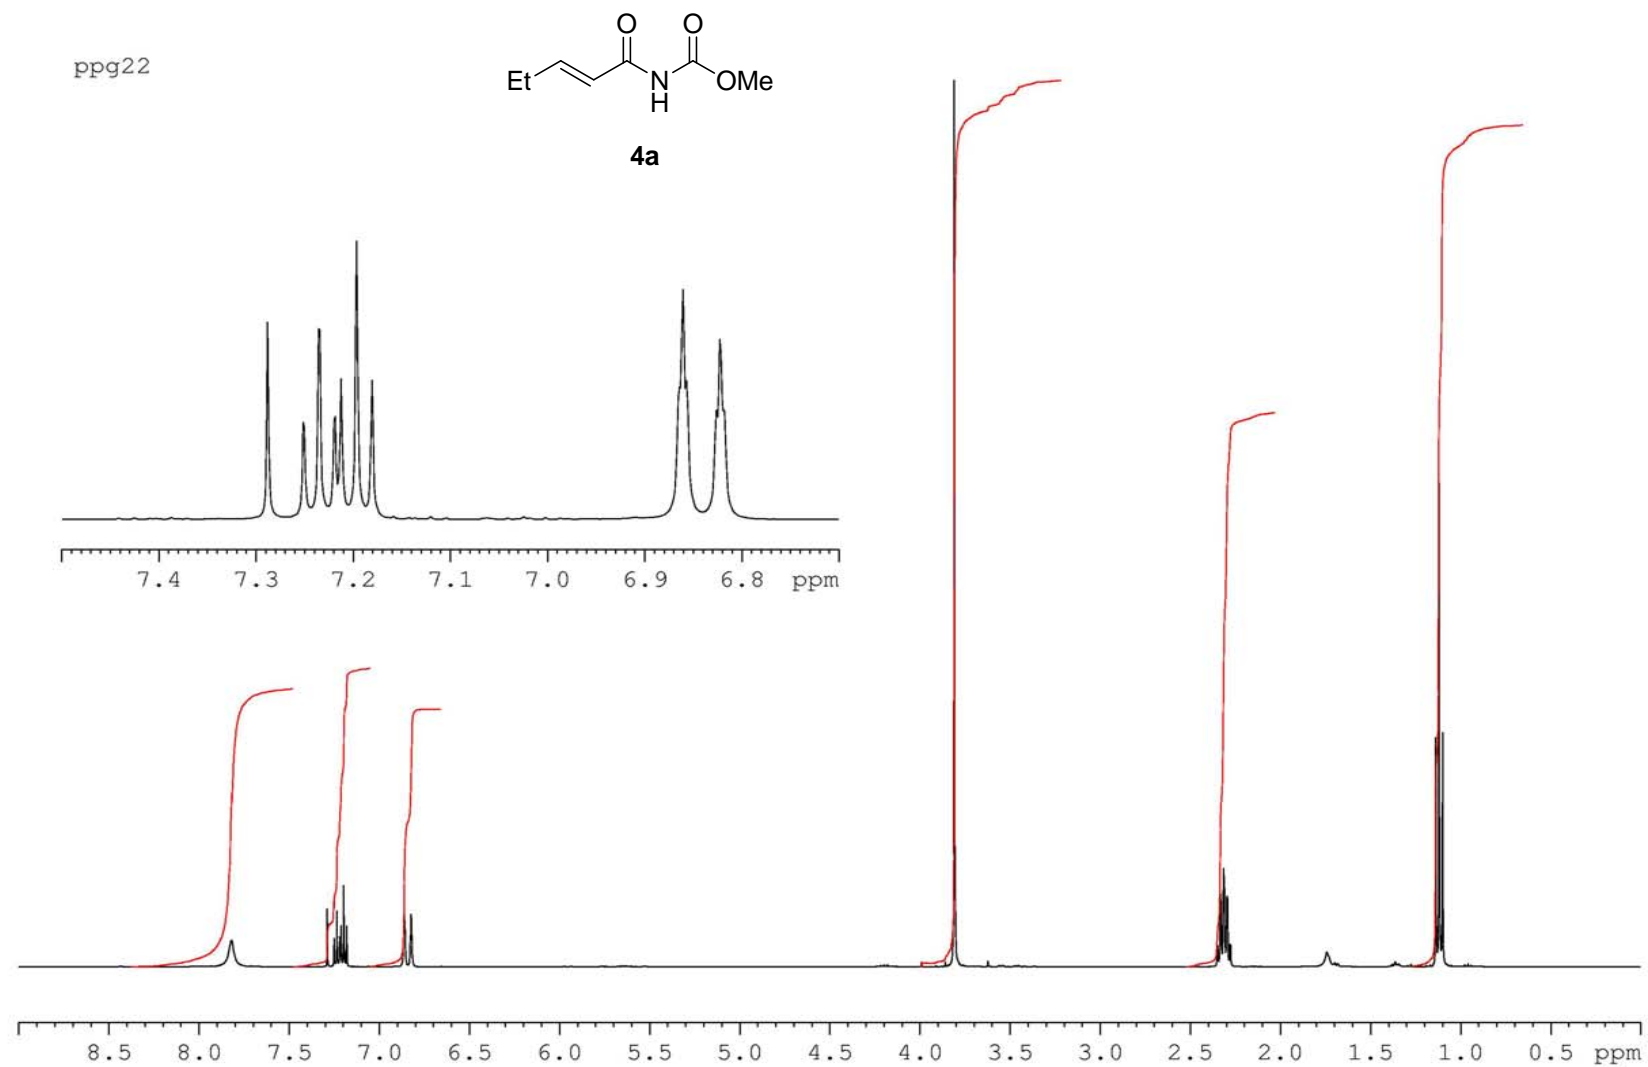

Fig. S6.  $^{13}\text{C}$  NMR spectrum of *N*-(Pent-2-enoyl)methyl carbamate, 4a

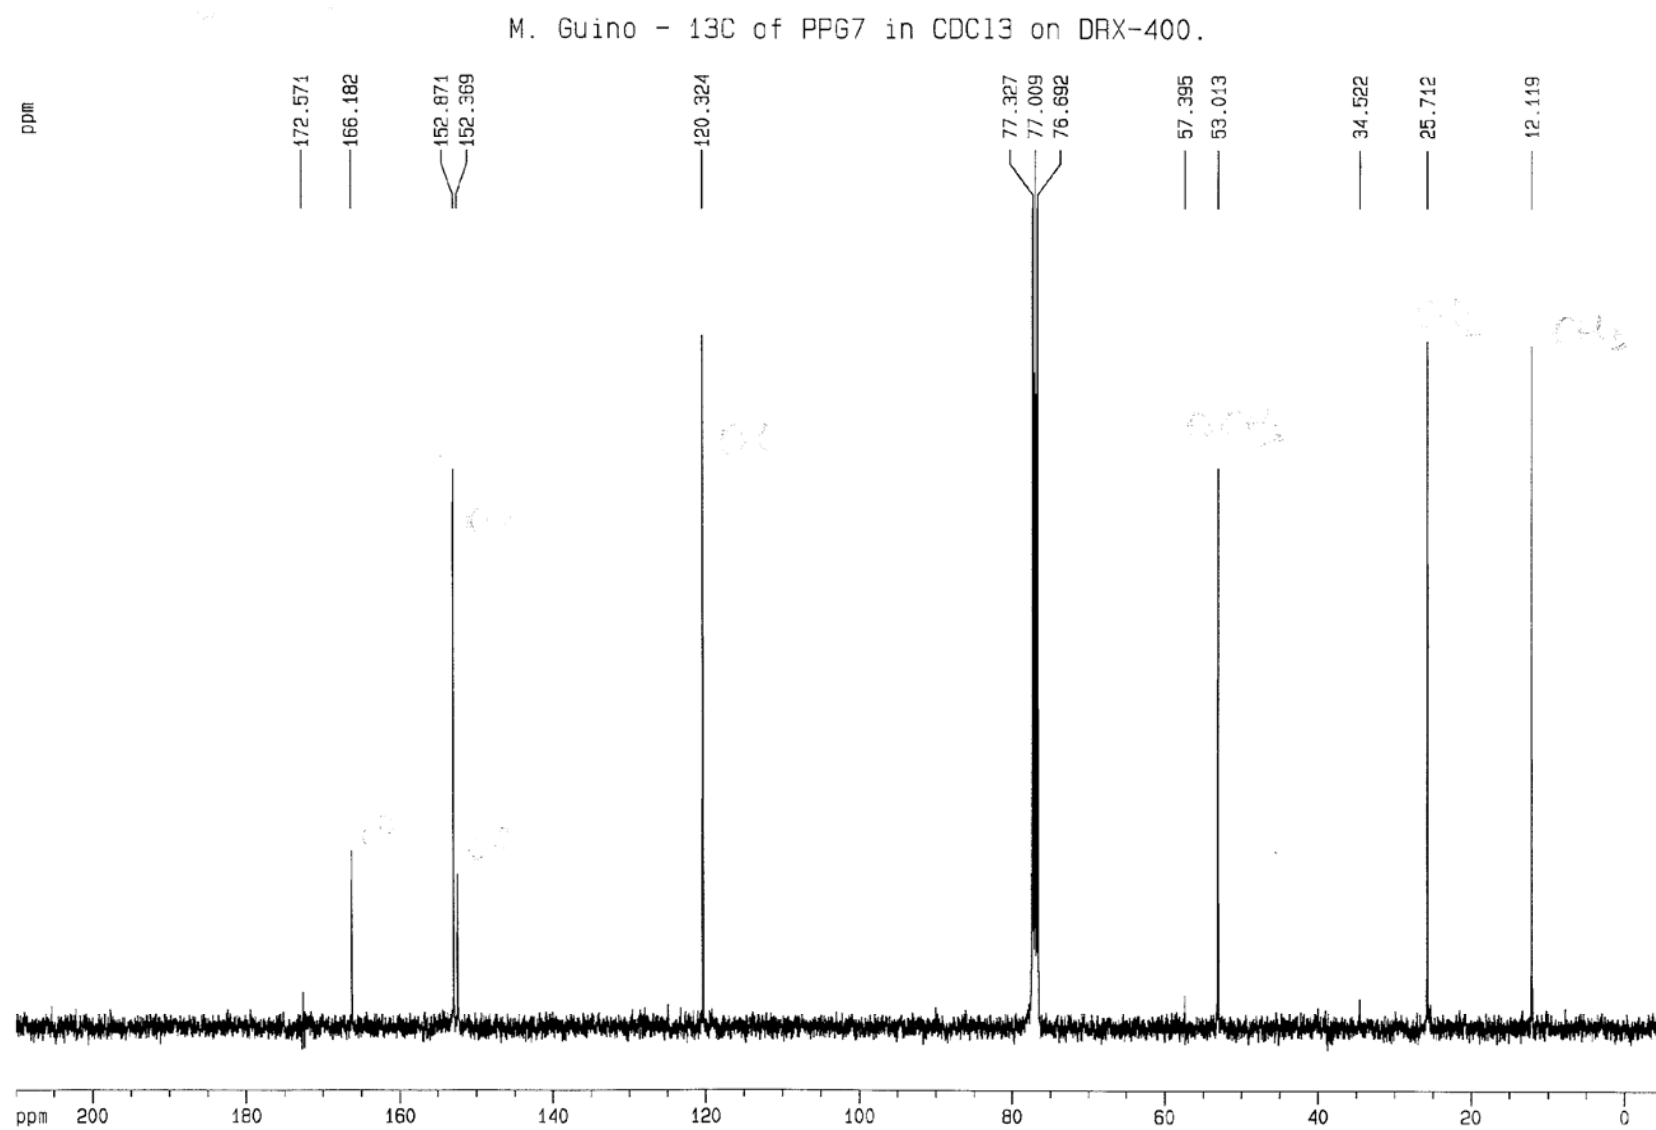

Fig. S7.  $^1\text{H}$  NMR spectrum of *N*-(Pent-2-enoyl)benzyl carbamate, **4b**

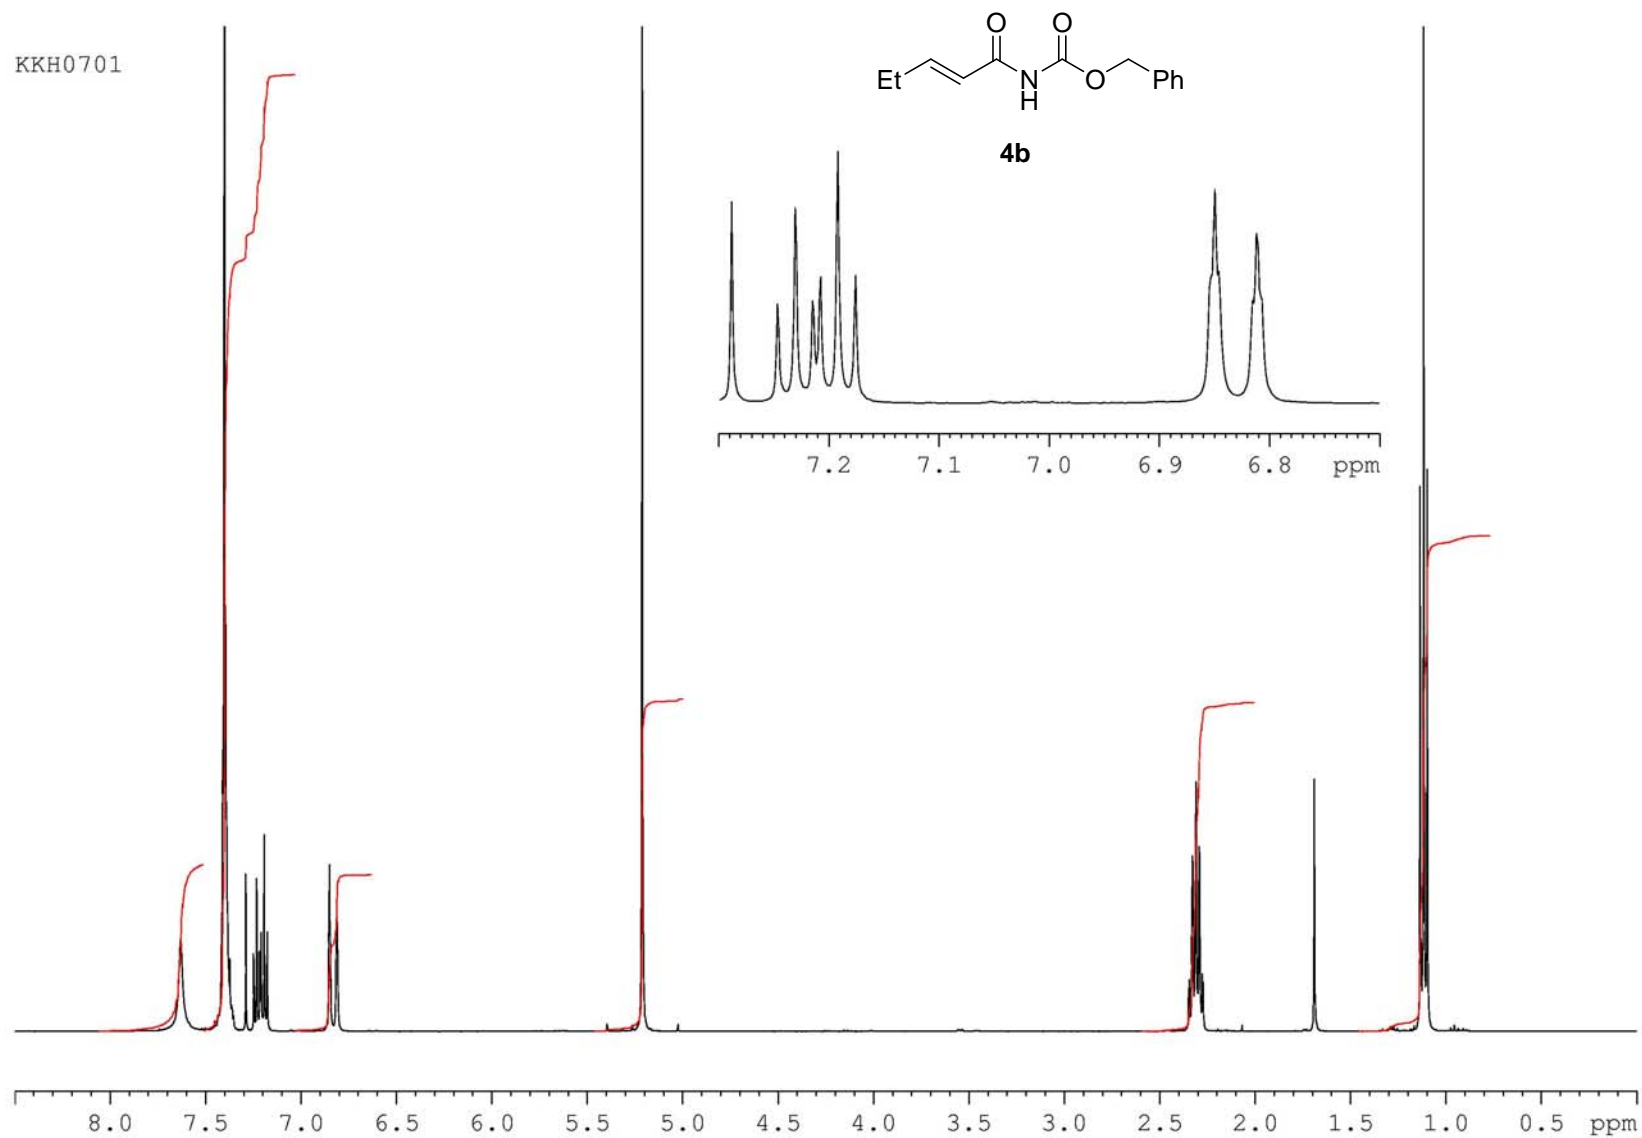

Fig. S8.  $^{13}\text{C}$  NMR spectrum of *N*-(Pent-2-enoyl)benzyl carbamate, 4b

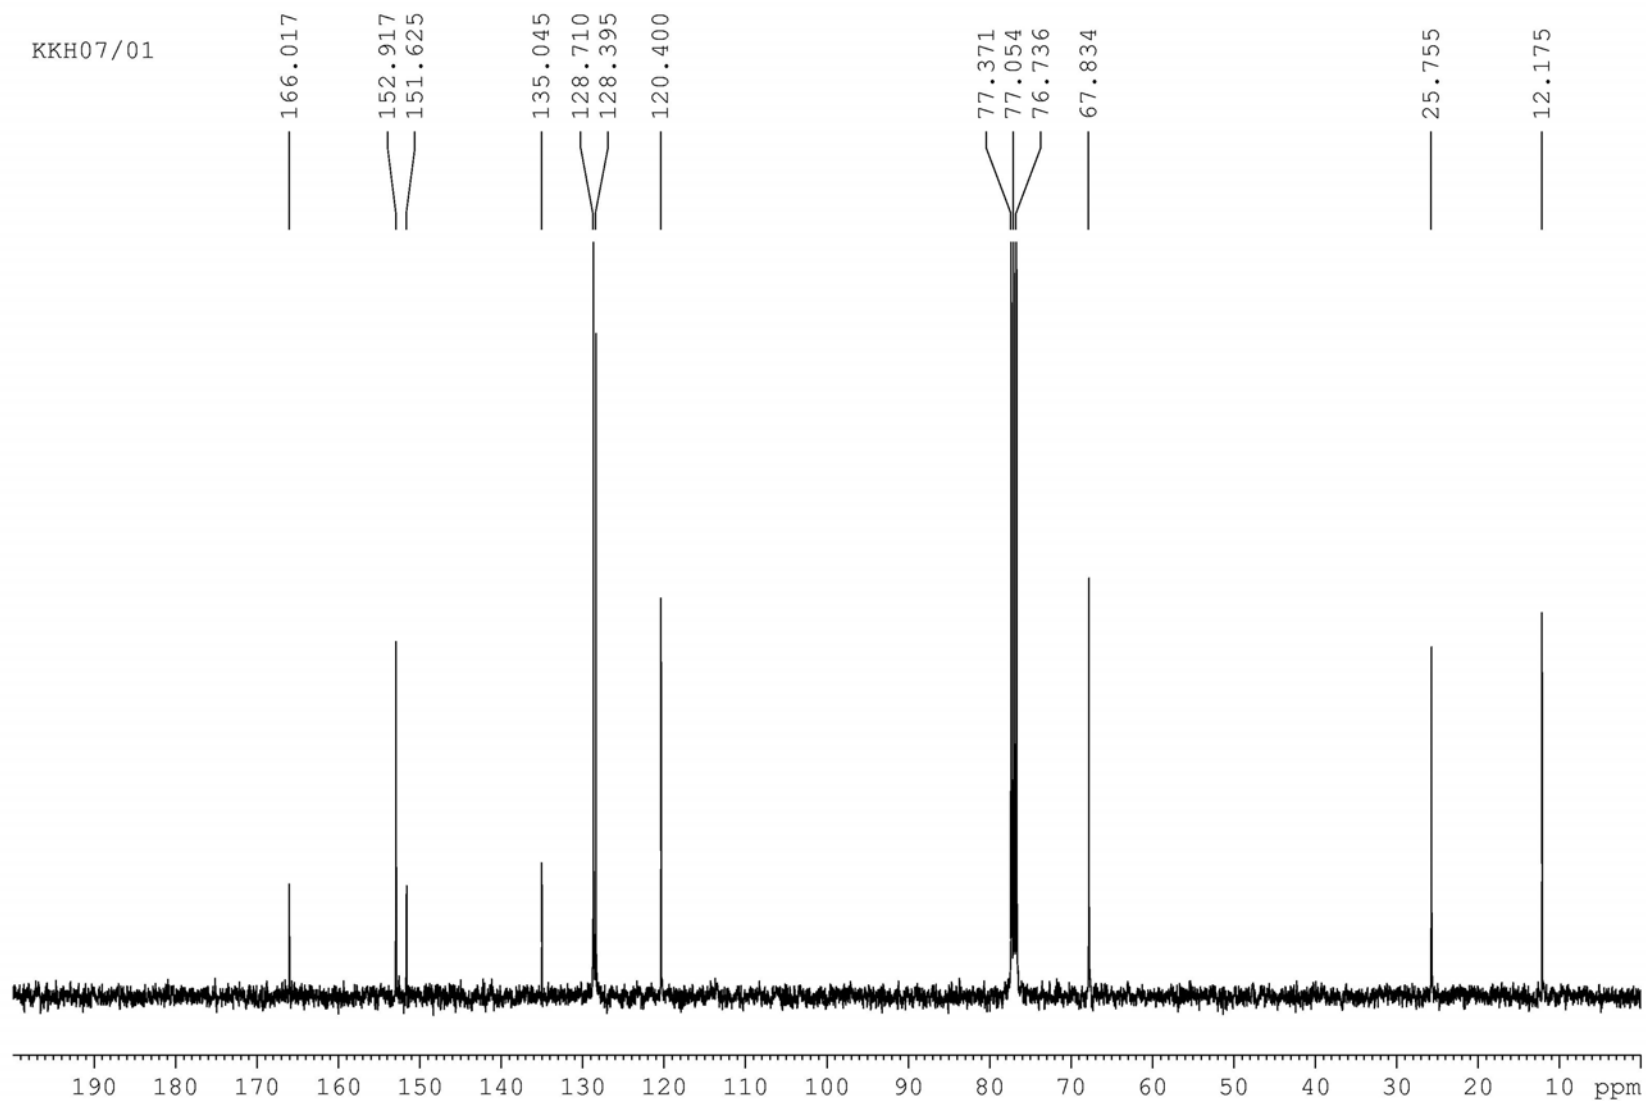



**Fig. S9.**  $^1\text{H}$  NMR spectrum of *N*-[3-(4-trifluoromethyl-phenylamino)-pentanoyl]methyl carbamate, **2a**

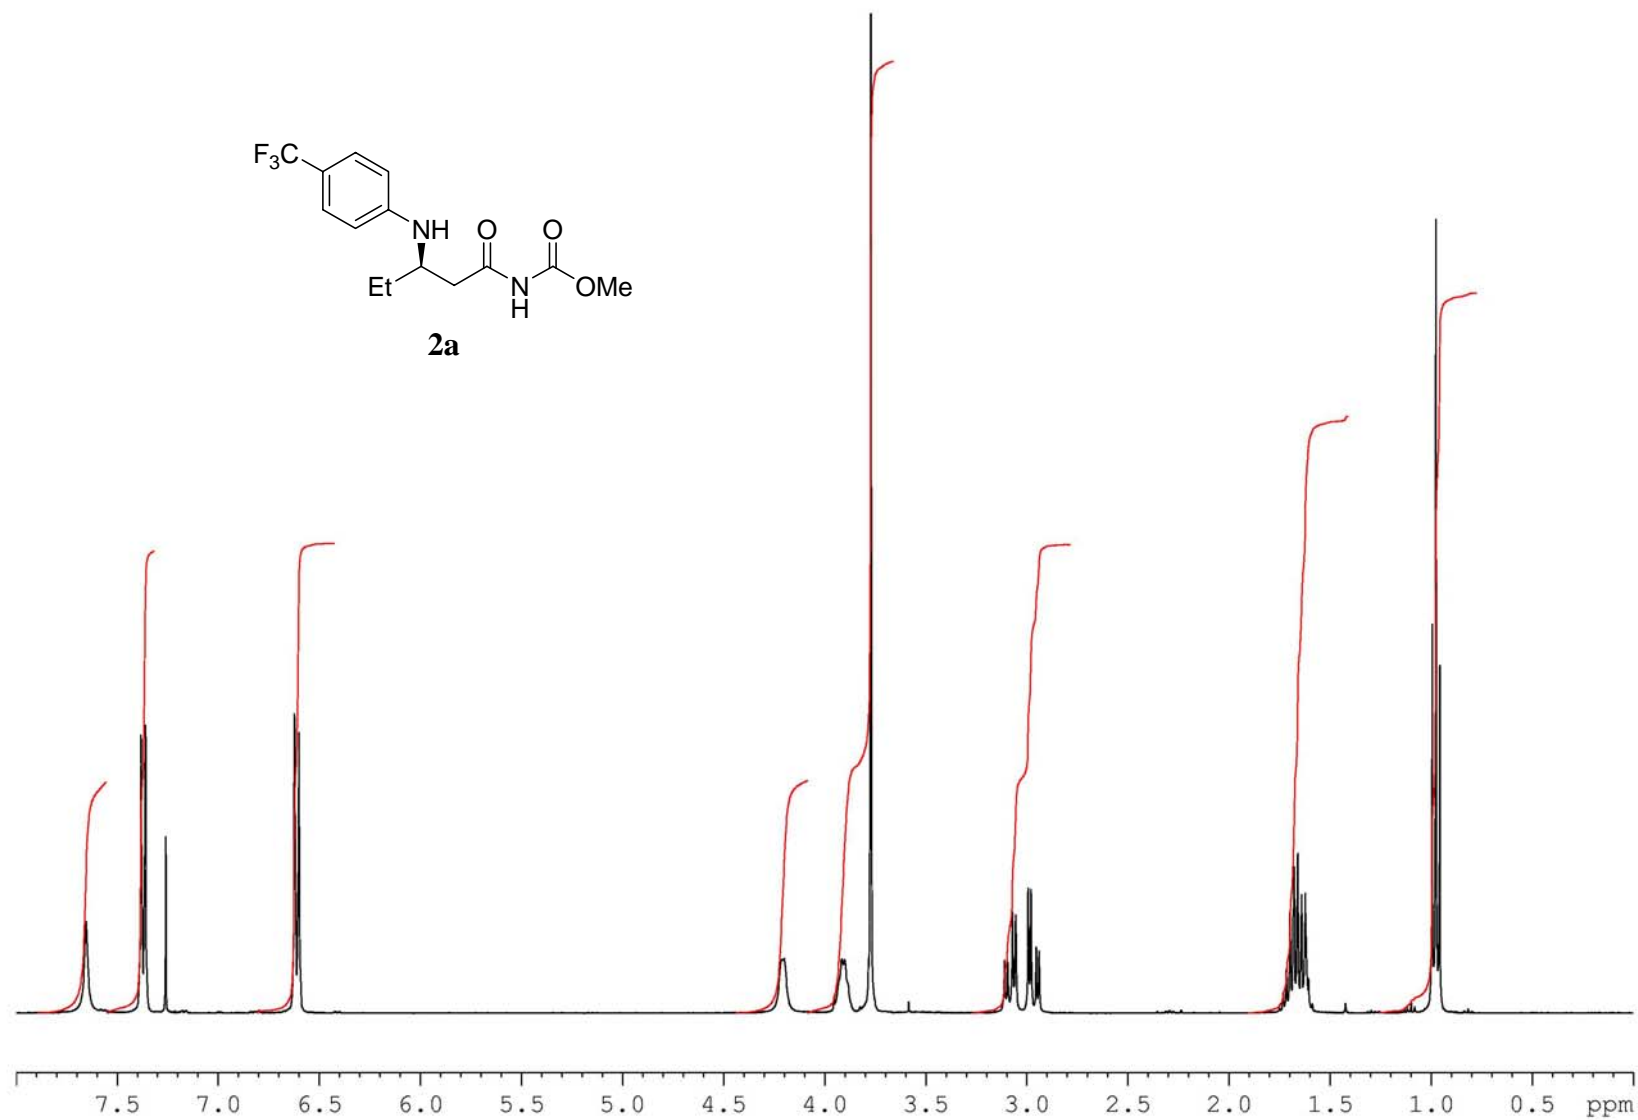

**Fig. S10.**  $^{13}\text{C}$  NMR spectrum of *N*-[3-(4-trifluoromethyl-phenylamino)-pentanoyl]methyl carbamate, **2a**

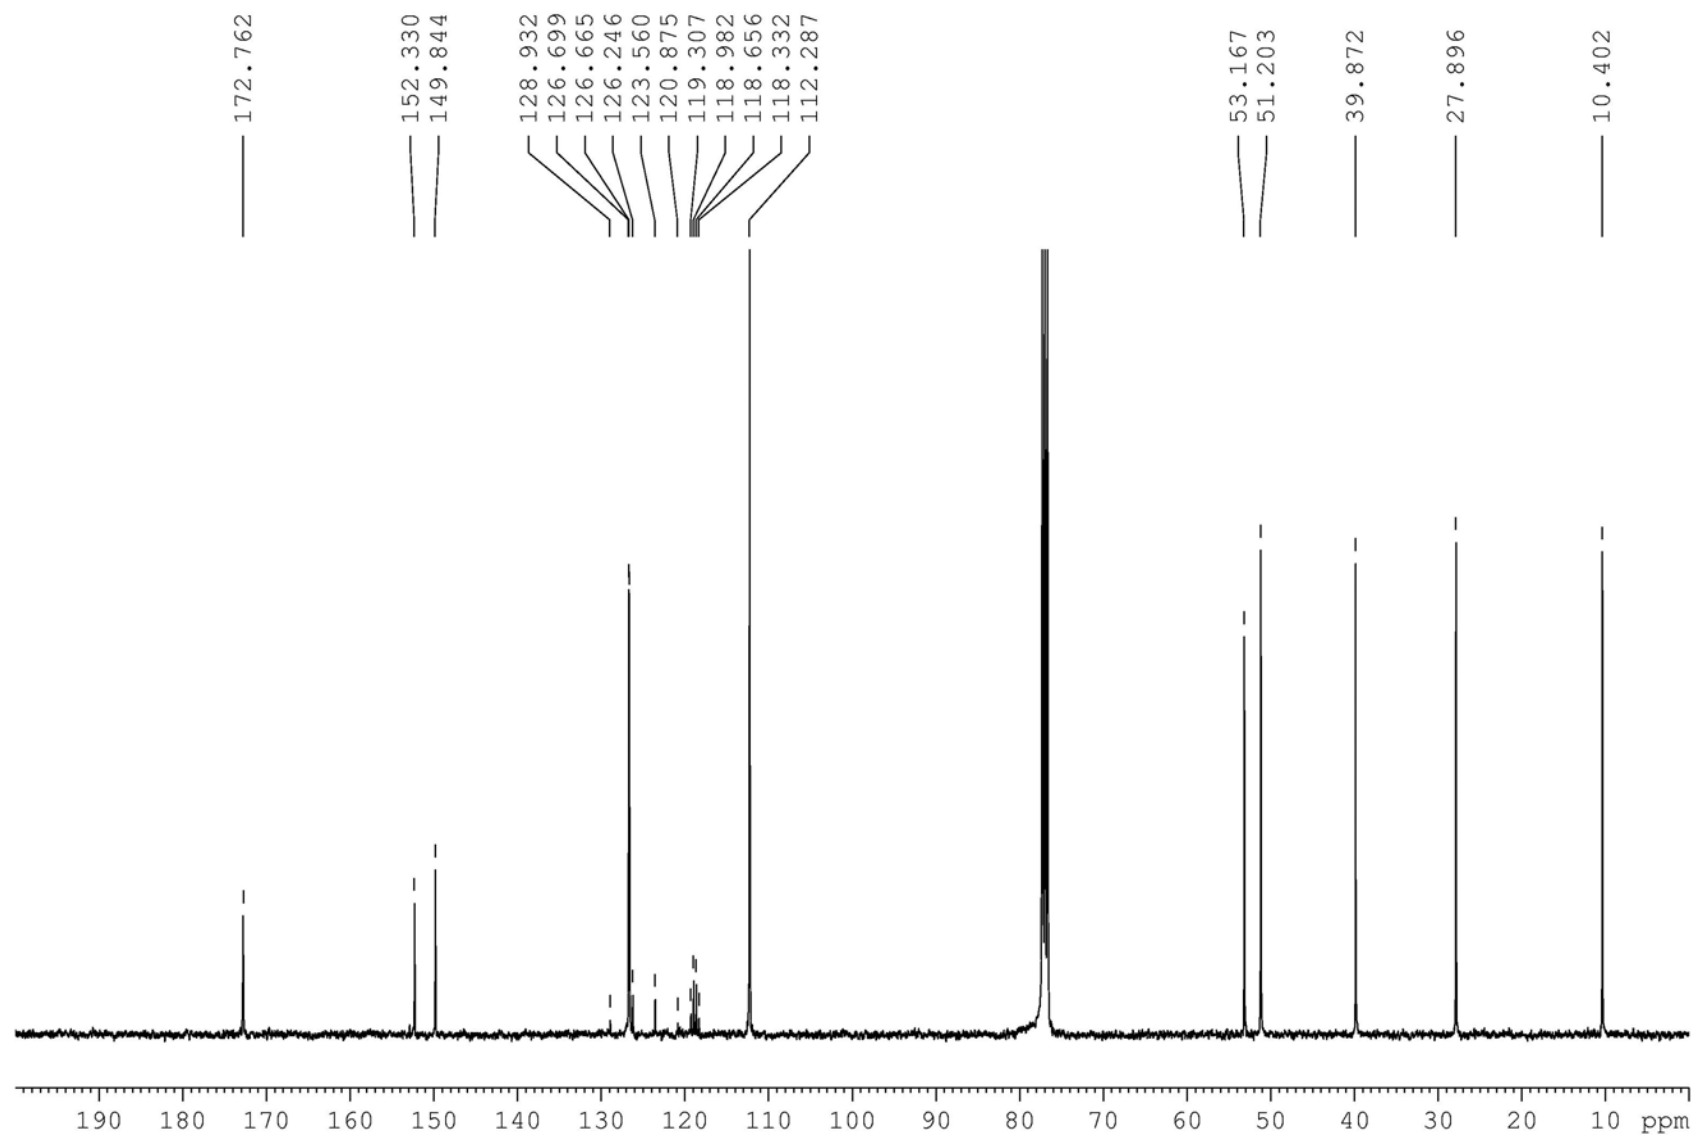

Fig. S11.  $^1\text{H}$  NMR spectrum of *N*-[3-(4-trifluoromethyl-phenylamino)-pentanoyl]benzyl carbamate, **2b**

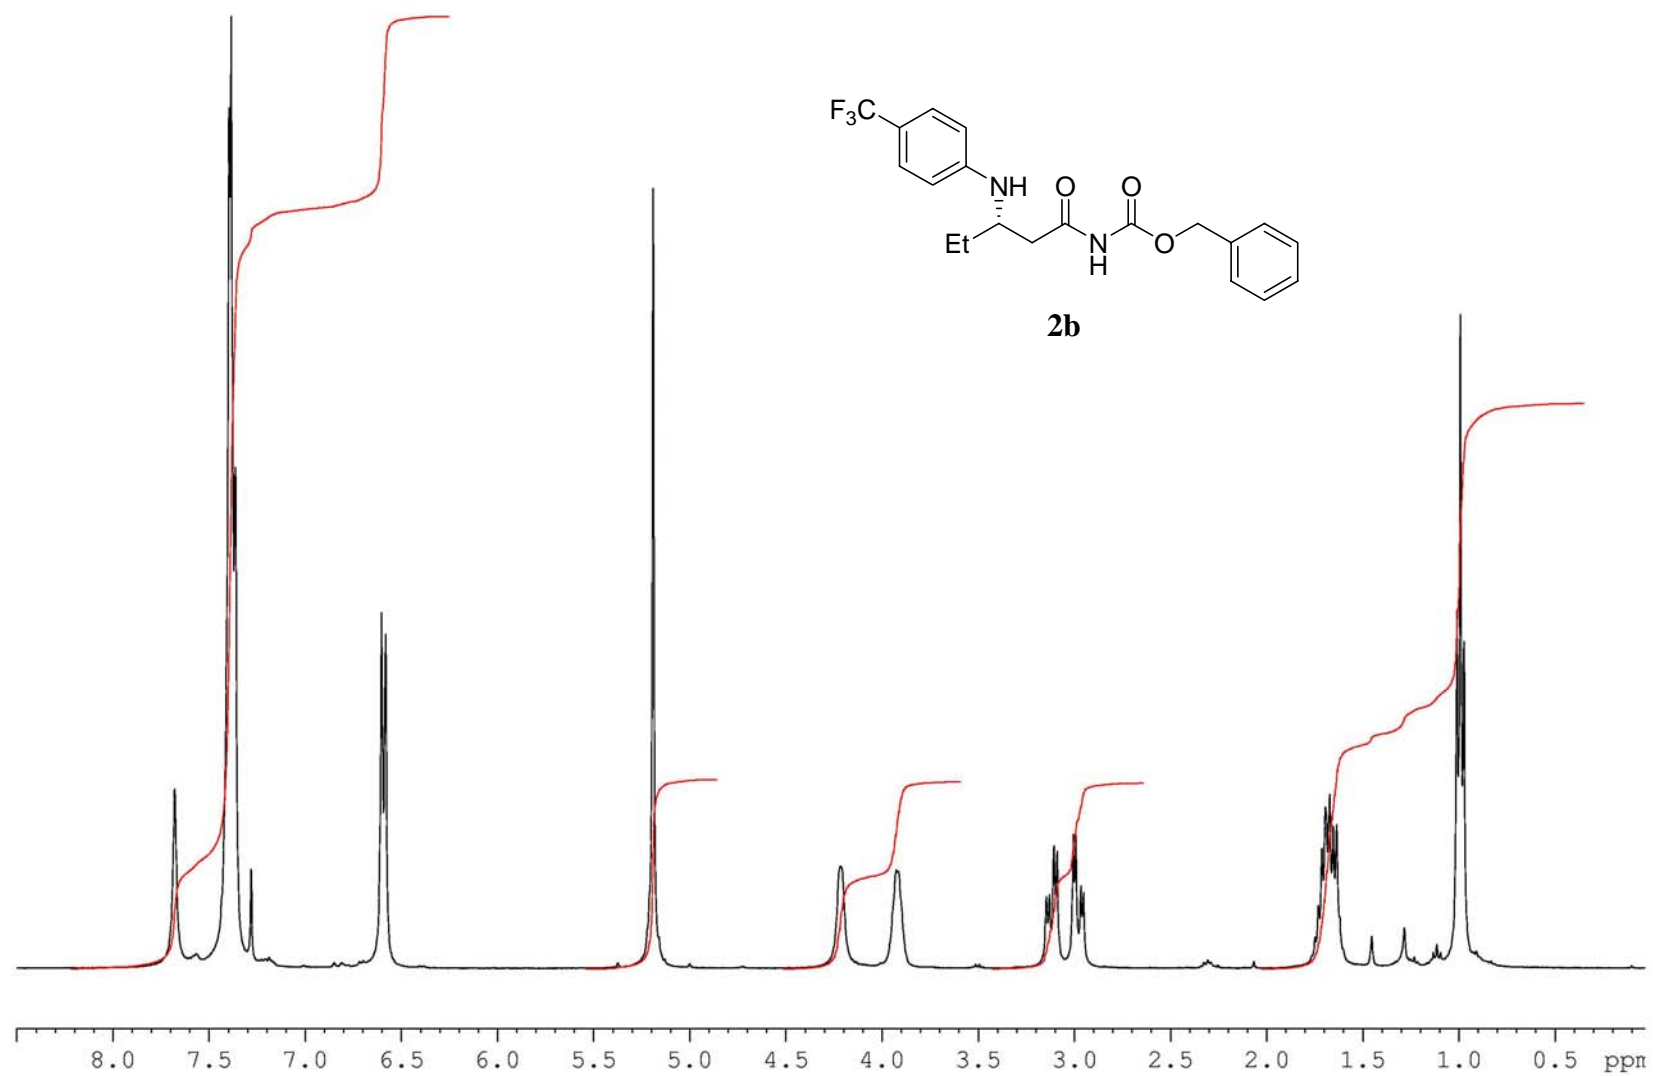

Fig. S12.  $^{13}\text{C}$  NMR spectrum of *N*-[3-(4-trifluoromethyl-phenylamino)-pentanoyl]benzyl carbamate, 2b

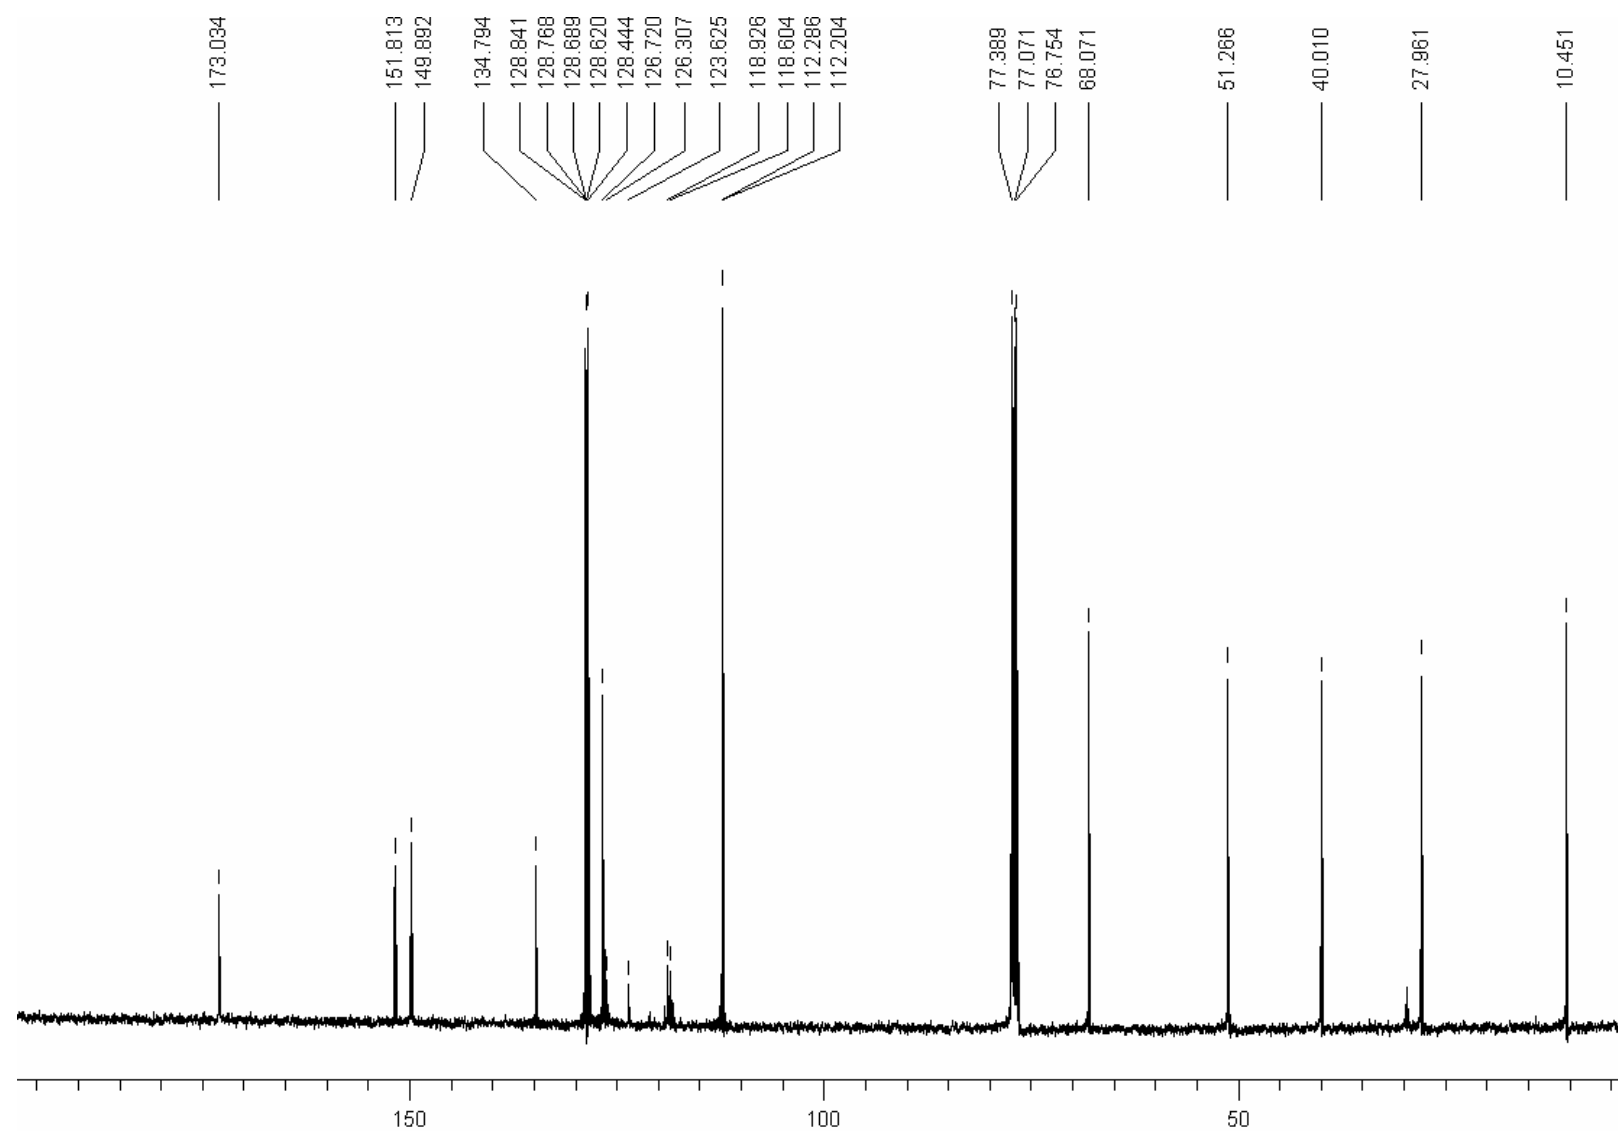

**Fig. S13. HPLC chromatograph of *rac*-*N*-[3-(4-trifluoromethyl-phenylamino)-pentanoyl]benzyl carbamate, *rac*-2b**

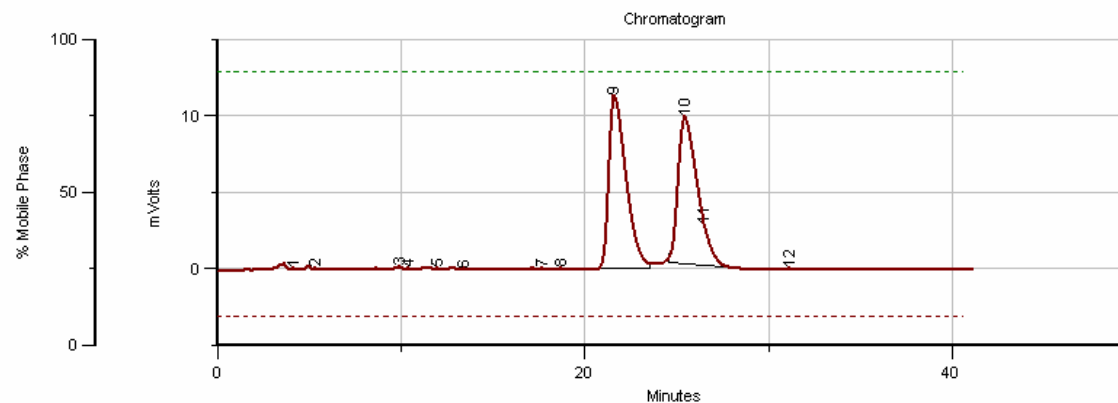

**Fig. S14. HPLC chromatograph of (*S*)-*N*-[3-(4-trifluoromethyl-phenylamino)-pentanoyl]benzyl carbamate, *N*-[3-(4-trifluoromethyl-phenylamino)-pentanoyl]benzyl carbamate, (*S*)-2b (89% ee).**

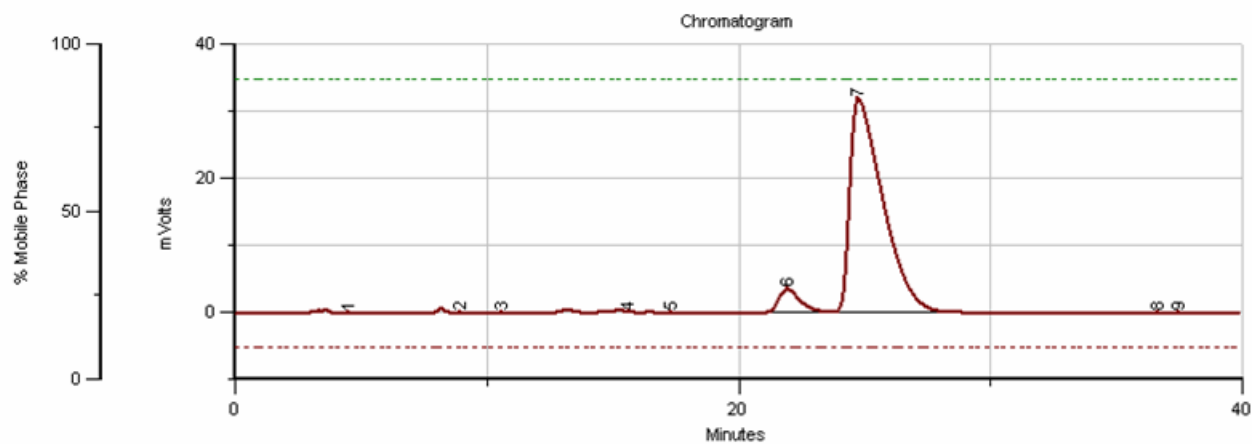

Fig. S15.  $^1\text{H}$  NMR spectrum of (2*R*,4*S*)-(2-Ethyl-6-trifluoromethyl-1,2,3,4-tetrahydroquinolin-4-yl)carbamic acid methyl ester, **5**.

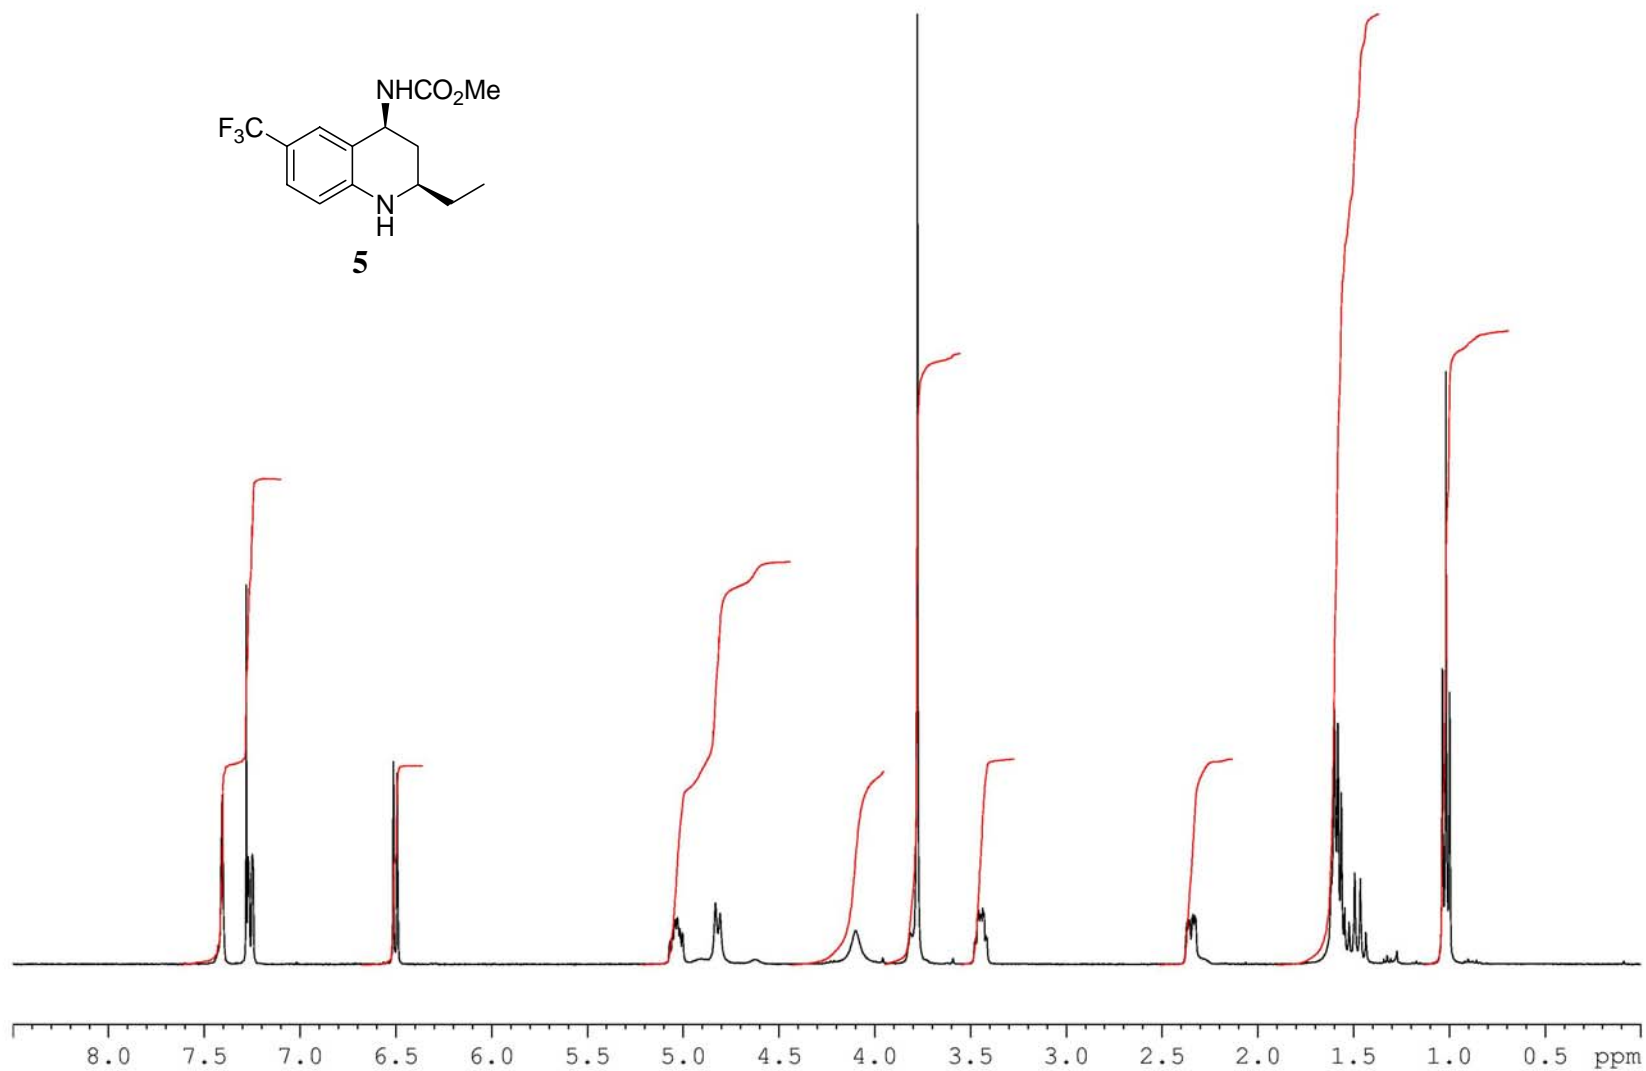

**Fig. S16.**  $^{13}\text{C}$  NMR spectrum of (2*R*,4*S*)-(2-Ethyl-6-trifluoromethyl-1,2,3,4-tetrahydroquinolin-4-yl)carbamic acid methyl ester, **5**.

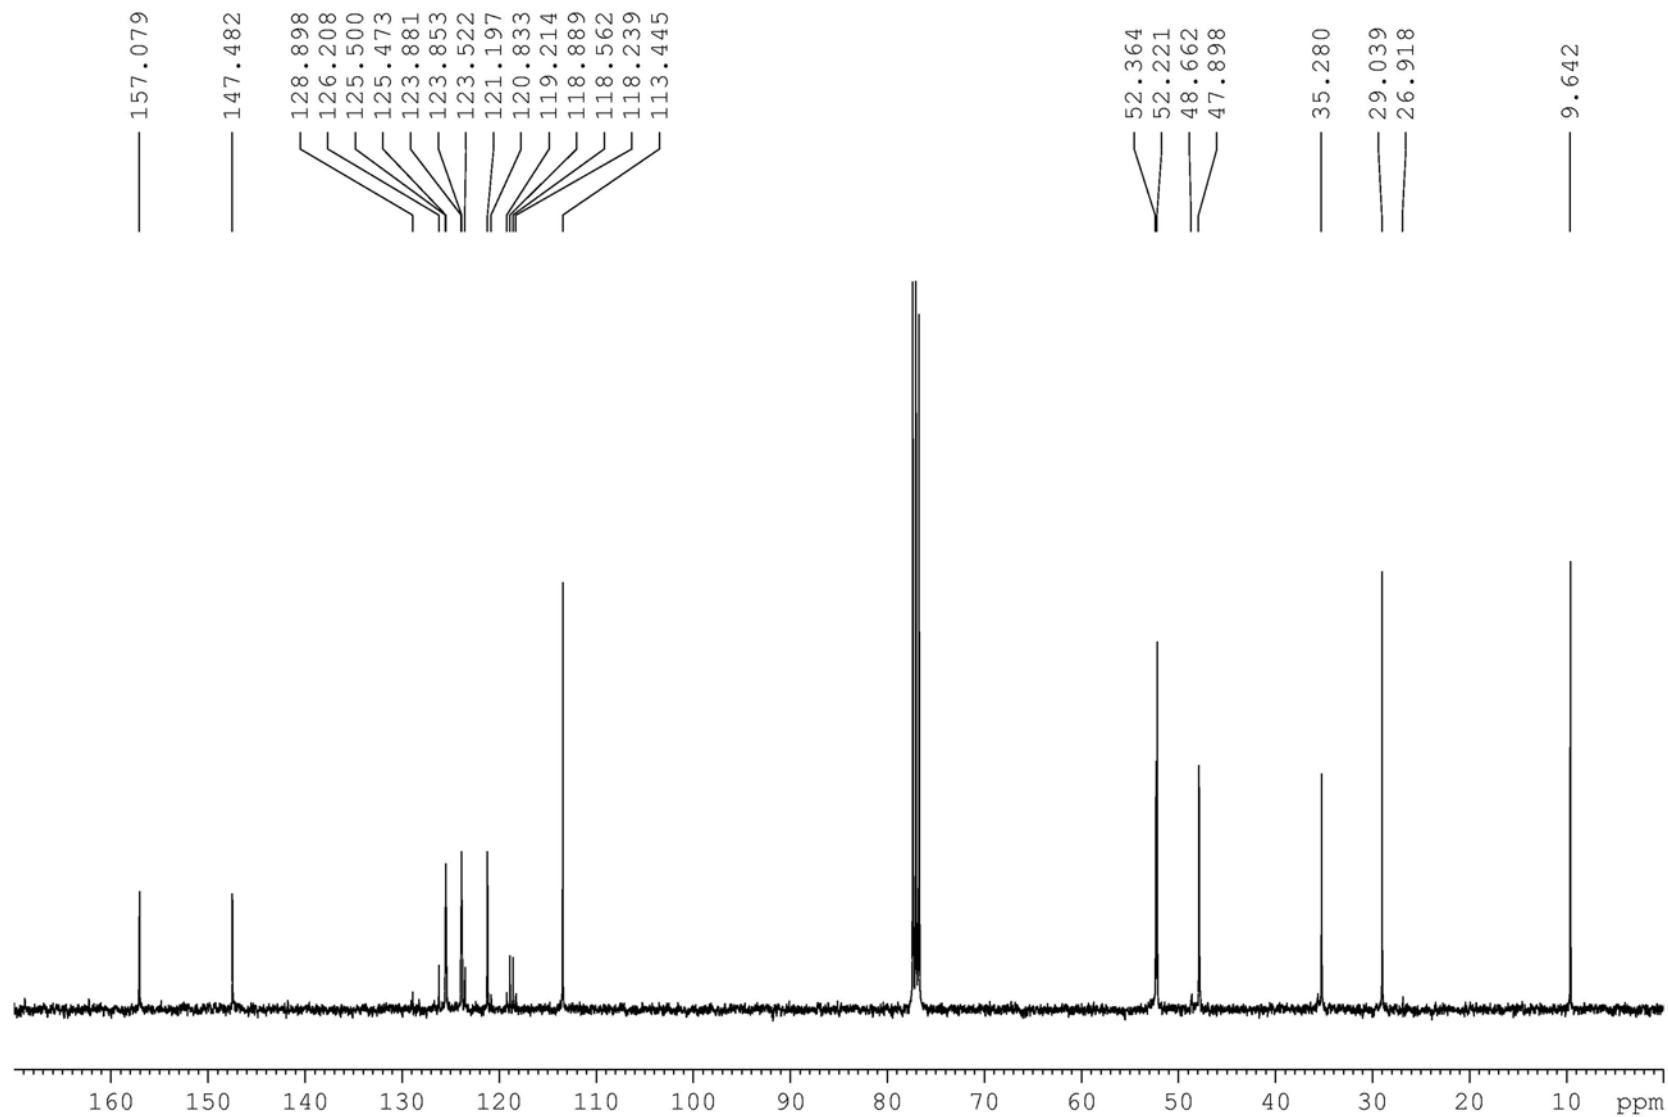

**Fig. S17.**  $^1\text{H}$  NMR spectrum of (2*R*,4*S*)-2-Ethyl-4-methoxycarbonylamino-6-trifluoromethyl-3,4-dihydro-2*H*-quinoline-1-carboxylic Acid Ethyl Ester, **6**.

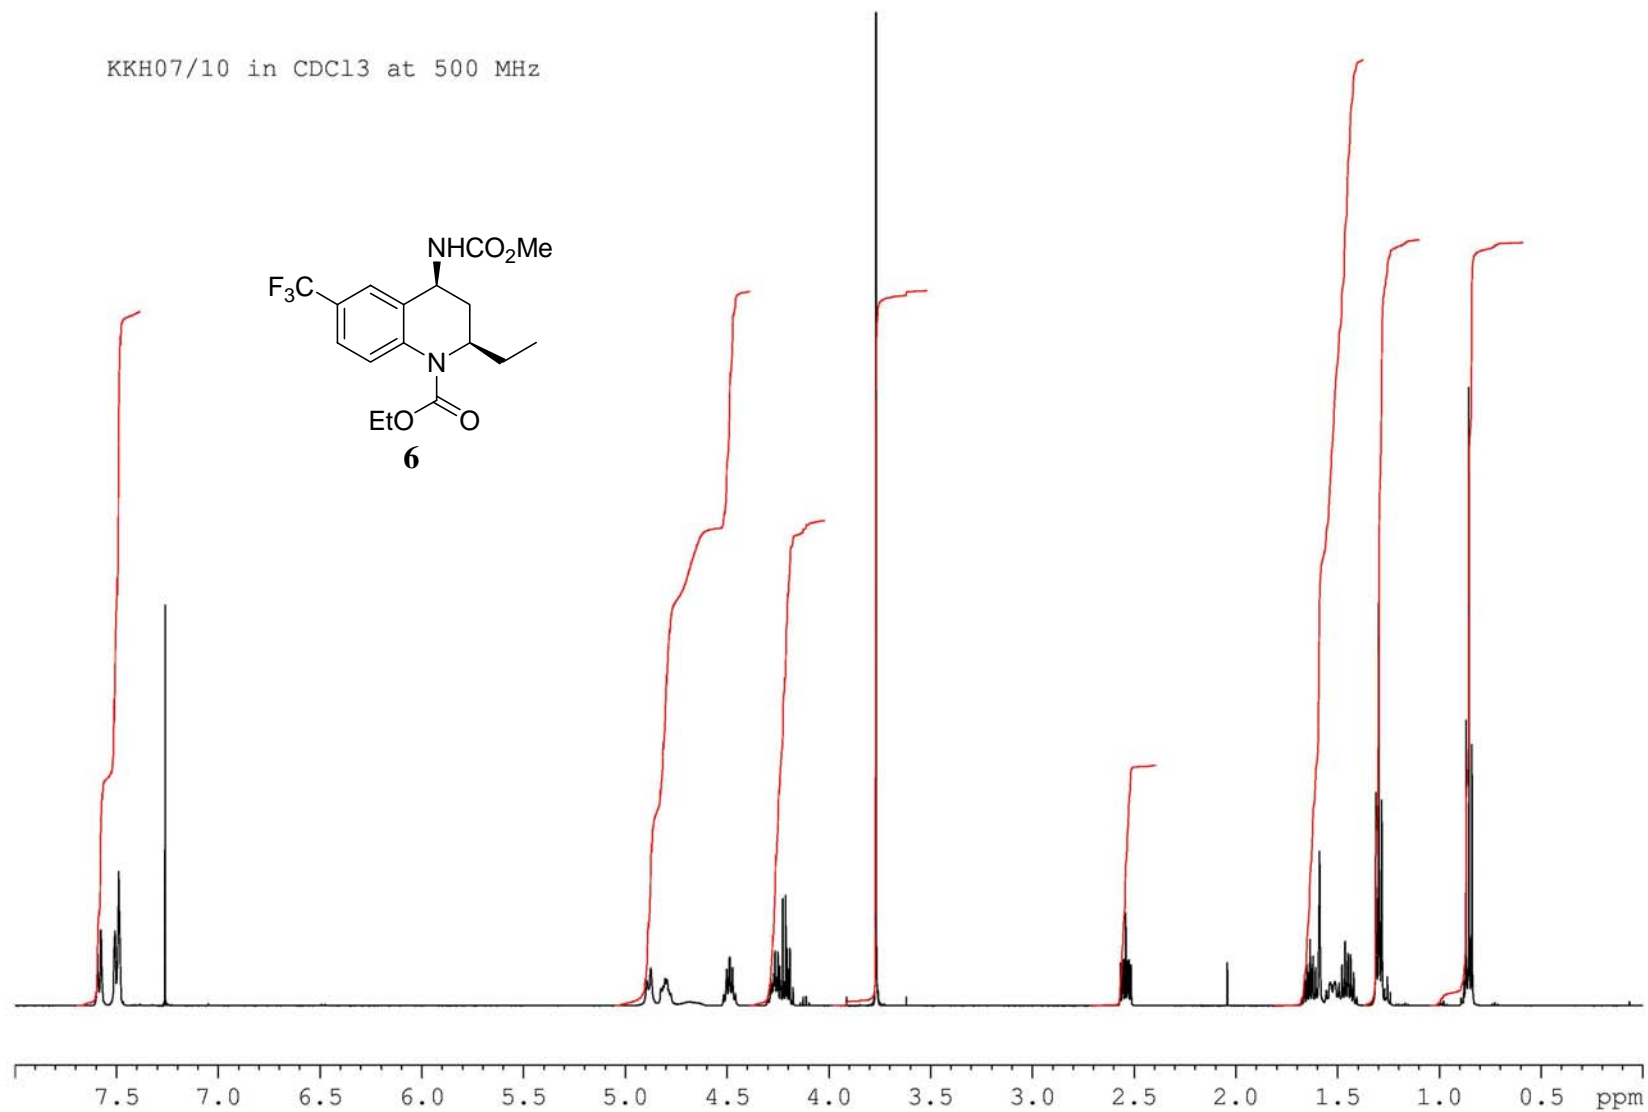



S18.  $^{13}\text{C}$  NMR spectrum of (2*R*,4*S*)-2-Ethyl-4-methoxycarbonylamino-6-trifluoromethyl-3,4-dihydro-2H-quinoline-1-carboxylic acid ethyl ester, **6**.

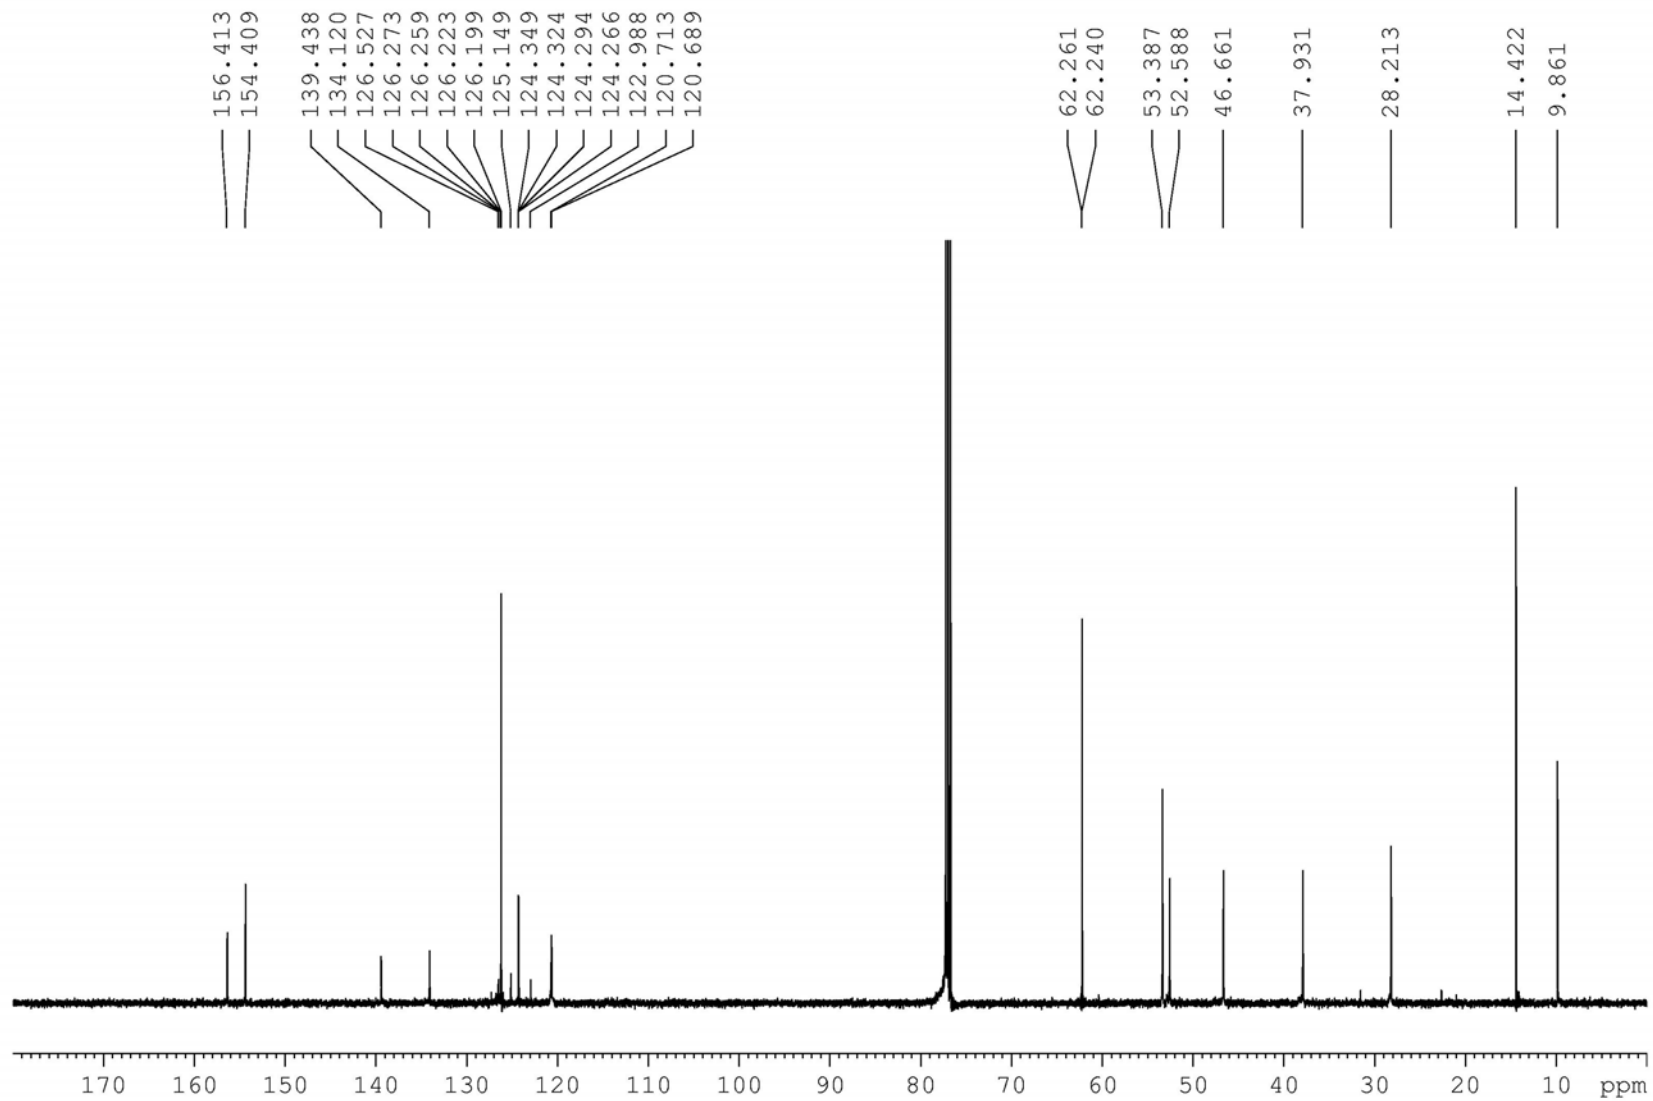

**Fig. S19.**  $^1\text{H}$  NMR spectrum of Torcetrapib, **1** (at 55 °C).

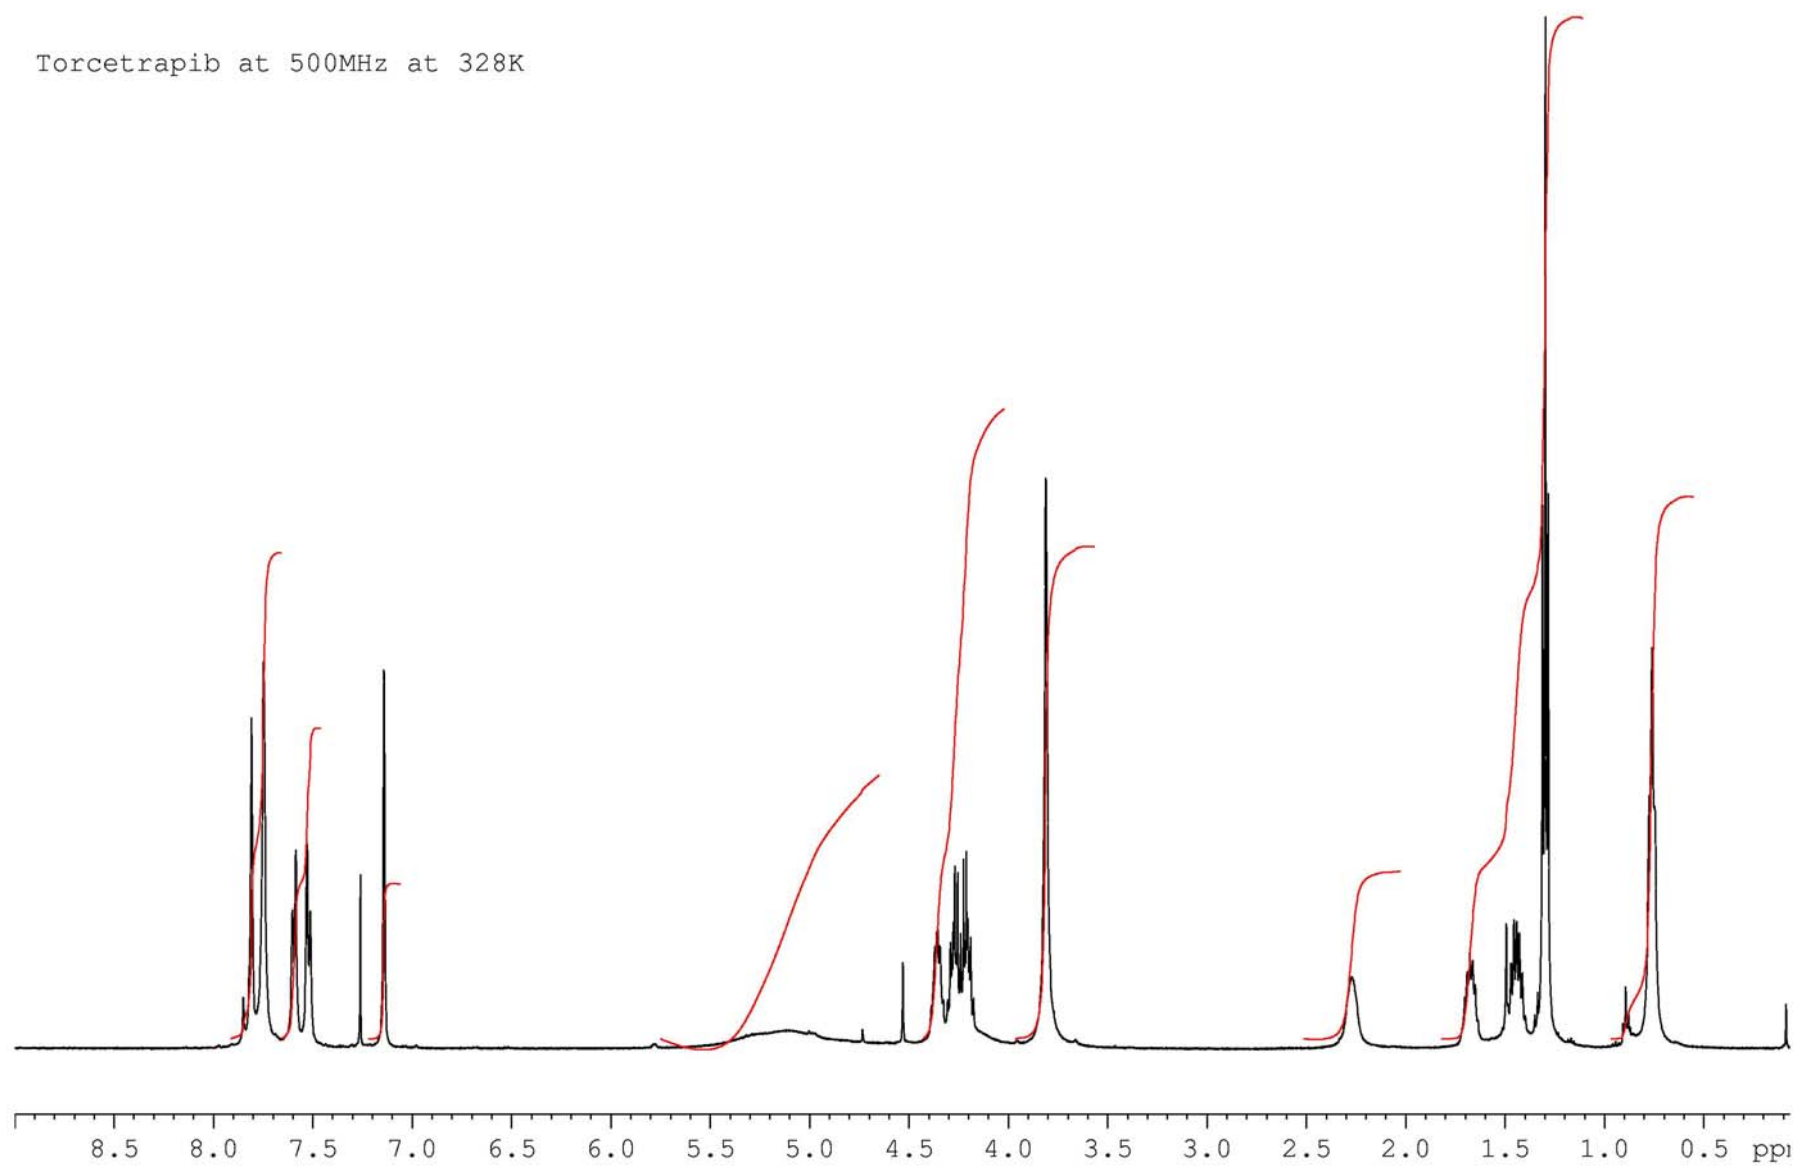

**Fig. S20.**  $^{13}\text{C}$  NMR spectrum of Torcetrapib, **1** (at 55  $^{\circ}\text{C}$ ).

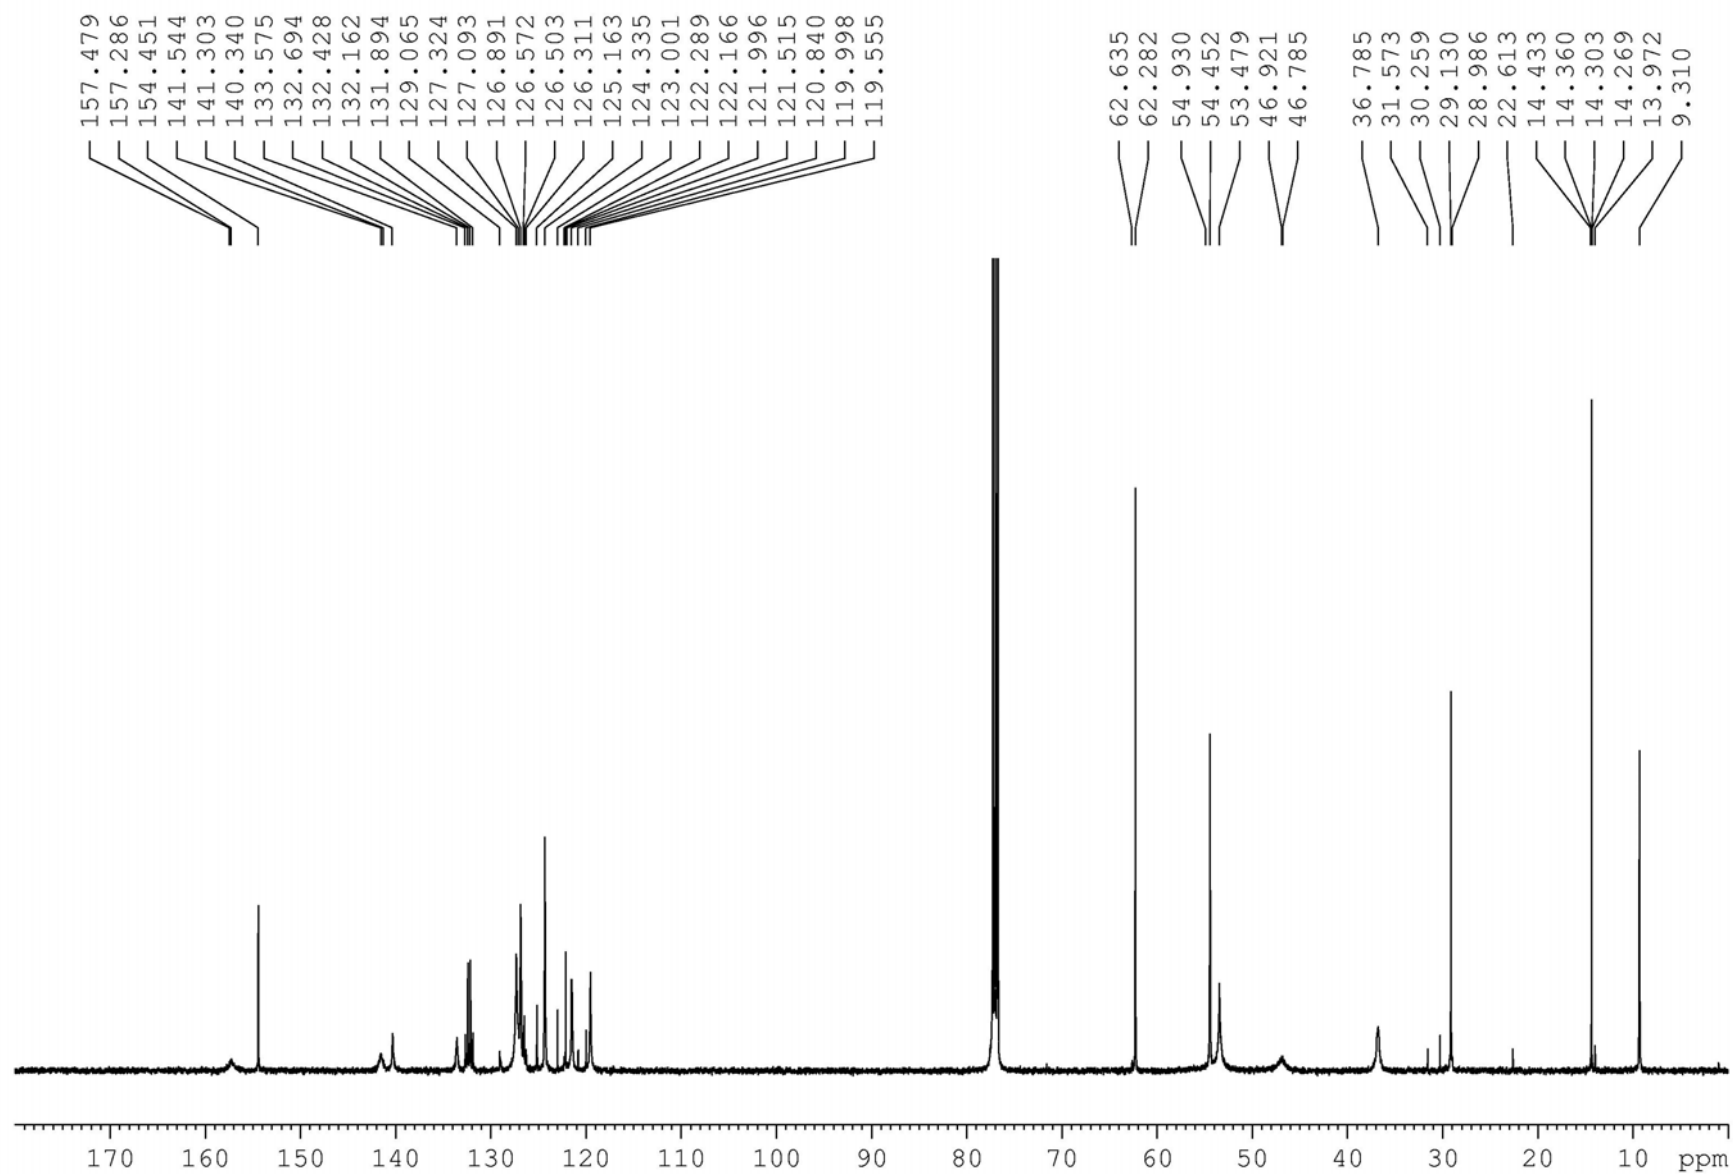

Supplement: Supplementary file 1 [file 4693828]
